1 **Ubiquitin ligases and a processive proteasome facilitate protein clearance**  
2 **during the oocyte-to-embryo transition in *Caenorhabditis elegans***

3

4 **Caroline A. Spike\*, Tatsuya Tsukamoto\*, and David Greenstein\*,<sup>1</sup>**

5

6 \*Department of Genetics, Cell Biology and Development, University of Minnesota,

7 Minneapolis, Minnesota 55455, USA

8

9 Running title: Protein Degradation During the OET

10

11 Keywords: oocyte meiotic maturation, oocyte-to-embryo transition, translational regulation,

12 RNA-binding proteins, ubiquitin-mediated protein degradation

13

14 <sup>1</sup>Corresponding author: David Greenstein, Department of Genetics, Cell Biology, and

15 Development, University of Minnesota, 4-208 MCB, 420 Washington Avenue SE, Minneapolis,

16 MN 55455. Tel: 612-624-3955; FAX: 612-626-6140. E-mail: [green959@umn.edu](mailto:green959@umn.edu)

17

18 **ABSTRACT**

19 The ubiquitin-mediated degradation of oocyte translational regulatory proteins is a conserved  
20 feature of the oocyte-to-embryo transition (OET). In the nematode *Caenorhabditis elegans*,  
21 multiple translational regulatory proteins, including the TRIM-NHL RNA-binding protein LIN-  
22 41/Trim71 and the Pumilio-family RNA-binding proteins PUF-3 and PUF-11, are degraded  
23 during the OET. Degradation of each protein requires activation of the M-phase cyclin-  
24 dependent kinase CDK-1, is largely complete by the end of the first meiotic division and does  
25 not require the anaphase promoting complex (APC). However, only LIN-41 degradation requires  
26 the F-box protein SEL-10/FBW7/Cdc4p, the substrate recognition subunit of an SCF-type E3  
27 ubiquitin ligase. This finding suggests that PUF-3 and PUF-11, which localize to LIN-41-  
28 containing ribonucleoprotein particles (RNPs), are independently degraded through the action of  
29 other factors and that the oocyte RNPs are disassembled in a concerted fashion during the OET.  
30 We develop and test the hypothesis that PUF-3 and PUF-11 are targeted for degradation by the  
31 proteasome-associated HECT-type ubiquitin ligase ETC-1/UBE3C/Hul5, which is broadly  
32 expressed in *C. elegans*. We find that several GFP-tagged fusion proteins that are degraded  
33 during the OET, including fusions with PUF-3, PUF-11, LIN-41, IFY-1/Securin and CYB-  
34 1/Cyclin B, are incompletely degraded when ETC-1 function is compromised. However, it is the  
35 fused GFP moiety that appears to be the critical determinant of this proteolysis defect. These  
36 findings are consistent with a conserved role for ETC-1 in promoting proteasome processivity  
37 and suggest that proteasomal processivity is an important element of the OET during which  
38 many key oocyte regulatory proteins are rapidly targeted for degradation.

39

## 40 **Article Summary**

41 The ubiquitin-mediated degradation of translational regulatory RNA-binding proteins is a  
42 conserved feature of the oocyte-to-embryo transition (OET). *C. elegans* LIN-41 is a master  
43 regulator of oogenesis and is found in a large translational regulatory ribonucleoprotein (RNP)  
44 complex with more than 1000 maternal transcripts and the Pumilio-family RNA-binding proteins  
45 PUF-3 and PUF-11. We show that the concerted action of ubiquitin-mediated protein  
46 degradation and proteasome processivity rapidly disassemble LIN-41-containing RNPs during  
47 the OET thereby relieving repression of many maternal transcripts.

48

49  
50  
51  
52  
53  
54  
55  
56  
57  
58  
59  
60  
61  
62  
63  
64  
65  
66  
67

## INTRODUCTION

The oocyte-to-embryo transition (OET) initiates when oocytes exit meiotic prophase and enter the first meiotic metaphase, a cell cycle and developmental event also known as meiotic resumption or meiotic maturation. The OET is complete when zygotic gene transcription begins after fertilization in the early embryo. In many mammals and in the nematode *Caenorhabditis elegans*, zygotic gene transcription begins early at the 2- or ~4-cell stage, respectively (Clegg and Pikó 1982; Latham *et al.* 1991; Edgar *et al.*, 1994; Seydoux and Fire 1994; Hamatani *et al.* 2004). In some animals, such as *Drosophila* and *Xenopus*, zygotic gene activation predominantly begins later—at approximately the eighth nuclear division in *Drosophila* (Pritchard and Schubiger 1996; reviewed by Harrison and Eisen 2015) and at the midblastula transition in *Xenopus* (Bachvarova *et al.* 1966; Newport and Kirschner 1982a,b; reviewed by Blitz and Cho 2021). Because the late-stage oocytes of most animals are transcriptionally quiescent, the regulation of protein translation by RNA-binding proteins represents a dominant mode of developmental control during oocyte meiotic maturation and the OET (reviewed by Kotani *et al.* 2017; Huelgas-Morales and Greenstein 2018; Teixeira and Lehmann 2019). In fact, genomic analyses suggest that mammalian oocytes contain more than 200 RNA-binding proteins (Luong and Conti 2019). The presumption is that many of these RNA-binding proteins regulate protein translation in oocytes and preserve the dowry of maternal mRNA contributed to the early embryo.

68  
69  
70  
71

In *C. elegans* oocytes, the TRIM-NHL RNA-binding protein LIN-41 is a key component of a large translational regulatory RNP complex that associates with more than 1000 mRNAs (Spike *et al.* 2014b; Tsukamoto *et al.* 2017). Many of these mRNAs encode protein components of LIN-41-containing RNPs and function as translational regulators during oogenesis or early

72 embryonic development. LIN-41 also mediates the 3'-untranslated region (UTR)-mediated  
73 translational repression of some of the transcripts that associate with LIN-41 in oocytes and has  
74 an essential function to promote the extended meiotic prophase of oocytes (Spike *et al.* 2014a,b;  
75 Tsukamoto *et al.* 2017). *lin-41* null mutants are sterile because they produce pachytene-stage  
76 oocytes that exit meiotic prophase prematurely; these oocytes inappropriately disassemble the  
77 synaptonemal complex, cellularize, activate the CDK-1/cyclin B cyclin-dependent kinase, and  
78 enter M phase (Spike *et al.* 2014a). Hypomorphic *lin-41* mutant alleles reduce oocyte quality and  
79 cause nondisjunction during female meiosis (Spike *et al.* 2014a). LIN-41 prevents the premature  
80 activation of the CDK-1/cyclin B during early oogenesis, in part, through the 3'UTR-mediated  
81 translational repression of the CDC-25.3 phosphatase, a CDK-1 activator (Spike *et al.* 2014a,b).  
82 Premature CDK-1 activation in *lin-41* mutant oocytes drives precocious M-phase entry and  
83 causes oocytes to abnormally transcribe and express genes that are normally expressed  
84 zygotically after the OET (Allen *et al.* 2014; Spike *et al.* 2014a; Tocchini *et al.* 2014; Matsuura  
85 *et al.* 2016). Thus, a major function of LIN-41 appears to be to preserve mRNAs that are  
86 maternally inherited and translationally activated late in oogenesis or during early embryonic  
87 development. Many LIN-41-associated transcripts are translated only after LIN-41 is inactivated  
88 and degraded via ubiquitin-mediated degradation upon the onset of meiotic maturation (Spike *et*  
89 *al.* 2018). For example, LIN-41 associates with and represses the translation of the ORC-1  
90 subunit of the origin recognition complex during meiotic prophase, and its degradation permits  
91 ORC-1 expression for DNA replication in the embryo (Tsukamoto *et al.* 2017).

92 LIN-41 is highly conserved and its mammalian ortholog, LIN-41/TRIM71, is required for  
93 embryonic viability and neural tube closure in mice (Maller Schulman *et al.* 2008; Chen *et al.*  
94 2012; Cuevas *et al.* 2015; Mitschka *et al.* 2015). This defect appears to be related to a

95 requirement for LIN-41/TRIM71 for maintaining pluripotency in neural progenitor cells in the  
96 embryo. LIN-41/TRIM71 has also been found to promote the pluripotency of embryonic stem  
97 cells in the mouse (Chang *et al.* 2012; Worringer *et al.* 2014; Mitschka *et al.* 2015; Liu *et al.*  
98 2021). The defects in pluripotency, which underlie the neural tube defects observed in LIN-  
99 41/TRIM71 deficient mice, may be highly relevant to the finding of *de novo* heterozygous LIN-  
100 41/TRIM71 missense mutations in congenital hydrocephalus cases in humans (Furey *et al.* 2018;  
101 Jin *et al.* 2020). Germ cell-specific depletion of LIN-41/TRIM71 in mice causes germ cell loss  
102 and sterility in both sexes (Torres-Fernández *et al.* 2021a). Interestingly, male mice with LIN-  
103 41/TRIM71-deficient germ cells exhibit a Sertoli cell-only phenotype, which resembles the  
104 infertility phenotype of human males with heterozygous LIN-41/TRIM71 mutations (Torres-  
105 Fernández *et al.* 2021a). The essential role of LIN-41/TRIM71 in female germ cells remains to  
106 be more fully explored. Thus, in mammals, LIN-41/TRIM71 mutations produce distinct  
107 phenotypes in germ cells and somatic cells, which highlights the flexibility of LIN-41/TRIM71  
108 proteins for deployment in developmental cell fate decisions. Indeed, LIN-41 was first  
109 discovered as a target of the *let-7* microRNA in the genetic pathway controlling the  
110 developmental timing of somatic cells in *C. elegans* (Reinhart *et al.* 2000; Slack *et al.* 2000). The  
111 regulation of LIN-41/TRIM71 orthologs by *let-7* microRNAs appears to be highly conserved in  
112 animals (O’Farrell *et al.* 2008; Kloosterman *et al.* 2004; Kanamoto *et al.* 2006; Lin *et al.* 2007;  
113 Rybak *et al.* 2009; Worringer *et al.* 2014). This mode of regulation is not observed in the *C.*  
114 *elegans* germline, as the *let-7* microRNA appears to be only expressed in somatic cells (Lau *et*  
115 *al.* 2001). A new twist is that recent studies suggest that mammalian LIN-41/TRIM71 can inhibit  
116 the accumulation of *let-7* microRNAs (Liu *et al.* 2021; Torres-Fernández *et al.* 2021b),  
117 suggesting its involvement as a component of a bistable developmental switch. Although it is not

118 known whether LIN-41 can inhibit the *let-7* pathway in *C. elegans*, it is clear that LIN-41 is a  
119 component of a bistable switch regulating oocyte meiotic maturation in this organism—LIN-41  
120 inhibits CDK-1 activation, and in turn, active CDK-1 promotes the ubiquitin-mediated  
121 degradation of LIN-41 upon the onset of meiotic maturation (Spike *et al.* 2018).

122         The rapid elimination of LIN-41 upon the onset of meiotic maturation is emblematic of  
123 the highly choreographed and exquisitely timed patterns of degradation of RNA-binding proteins  
124 during late oogenesis and the OET in many organisms (Nishi *et al.* 2005; Stitzel *et al.* 2006;  
125 Shirayama *et al.* 2006; Sha *et al.* 2017; Kisielnicka *et al.* 2018; Cao *et al.* 2020, 2021; Zavortink  
126 *et al.* 2020; reviewed by Robertson and Lin 2015). Previous results suggested that an SCF-type  
127 E3 ubiquitin ligase containing the FBW7/Cdc4 ortholog SEL-10 promotes the degradation of  
128 LIN-41 using a bi-partite degron located near the N-terminus of LIN-41 (Spike *et al.* 2018). The  
129 ubiquitin proteasome pathway utilizes an E1-E2-E3 enzymatic relay to transfer ubiquitin to mark  
130 proteins for degradation by the 26S proteasome. E3 ubiquitin ligases, comprising multi-subunit  
131 enzymes or single chain proteins, function as substrate specificity factors to conjugate multiple  
132 ubiquitin moieties to target proteins. SEL-10 is a highly conserved and well-studied substrate-  
133 recognition subunit (Hubbard *et al.* 1997, de la Cova and Greenwald 2012). After substrate  
134 proteins are recognized and ubiquitinated, they are received by the 19S regulatory particles of the  
135 proteasome, which bind the ubiquitin chains, unfold the substrate, and processively translocate it  
136 into the 20S particle for degradation (reviewed by Finley 2009; Collins and Goldberg 2017).

137         In this work, we strengthen our understanding of LIN-41 degradation and begin to  
138 investigate how additional RNA-binding proteins in LIN-41 RNPs are degraded upon the onset  
139 of meiotic maturation. First, we show that SEL-10 is expressed in oocytes and use  
140 photoconversion of DENDRA::LIN-41 in maturing oocytes to demonstrate unequivocally that



141 SEL-10 is required to degrade LIN-41 during the OET. Next, we identify the Pumilio/FBF-  
142 family RNA-binding proteins PUF-3 and PUF-11 as proteins that are degraded soon after  
143 meiotic maturation. PUF-3 and PUF-11 are components of LIN-41-containing RNPs in oocytes  
144 (Tsukamoto *et al.* 2017) that are 89 percent identical at the amino acid level and play important  
145 roles in germline stem cell and embryonic development (Hubstenberger *et al.* 2012, Haupt *et al.*  
146 2020). Although both PUF-3 and PUF-11 are degraded soon after meiotic maturation in a CDK-  
147 1-dependent fashion, the degradation of both proteins occurs independently of SEL-10.  
148 Collectively, these results indicate that PUF-3 and PUF-11 are not degraded as a consequence of  
149 LIN-41 degradation and that LIN-41 RNPs are dismantled in a concerted fashion during the  
150 OET. Finally, we find that several different GFP-tagged fusion proteins that are degraded during  
151 the OET, including fusions with PUF-3, PUF-11 and LIN-41, are incompletely degraded when  
152 the function of the conserved ETC-1/UBE3C/Hul5 HECT-domain ubiquitin ligase is abrogated,  
153 indicating that ETC-1 is important for proteasome processivity. We provide evidence that the  
154 GFP tag causes this proteolysis defect, re-evaluate key aspects of a previous report that assigned  
155 a different role to ETC-1 (Wang *et al.* 2013), and propose that proteasomal processivity is  
156 critical for the rapid and efficient targeting of a plethora of oocyte regulatory proteins for  
157 degradation during the OET.

158

159

## MATERIALS AND METHODS

### 160 *Strains*

161 The genotypes of strains used in this study are reported in Table S1. The following mutations  
162 were used: LGI—*rnp-8*(*tn1860[rnp-8::gfp::tev::3xflag]*), *mat-1*(*ax161ts*), *lin-*  
163 *41*(*tn1541[gfp::tev::s::lin-41]*), *lin-41*(*tn1892[mscarlet::tev::3xflag:lin-41]*), *lin-*  
164 *41*(*tn1894[dendra::tev::3xflag::lin-41]*), *lin-41*(*tn2054[gfp::tev::3xflag::lin-41]*), *lin-*  
165 *41*(*tn2055[gfp::tev::3xflag::lin-41]*), and *fog-3*(*q443*). *lin-41*(*tn2054*) and *lin-41*(*tn2055*) were  
166 generated independently but are identical at the DNA sequence level. LGII—*etc-1*(*gk5182*), *etc-*  
167 *1*(*tn1919[gfp::tev::3xflag::etc-1]*), *etc-1*(*tn1920[gfp::tev::3xflag::etc-1]*), and *unc-4*(*e120*).  
168 LGIII—*plk-1*(*or683ts*), *emb-30*(*tn377ts*), and *cul-2*(*or209ts*). LGIV—*puf-11*(*tn1824[puf-*  
169 *11:gfp::tev::3xflag]*), *puf-11*(*q971*), *cyb-1*(*tn1806[cyb-1::gfp::tev::3xflag]*), *unc-22*(*e66*), *puf-*  
170 *3*(*tn1820[puf-3::gfp::tev::3xflag]*), and *puf-3*(*q966*). LGV—*lon-3*(*e2175*), *sel-10*(*ar41*), *sel-*  
171 *10*(*ok1632*), *sel-10*(*tn1816[sel-10::gfp::tev::3xflag]*), *sel-10*(*tn1817[sel-10::gfp::tev::3xflag]*),  
172 *sel-10*(*tn1875[gfp::tev::3xflag::sel-10]*) and *fog-2*(*oz40*). *sel-10*(*tn1816*) and *sel-10*(*tn1817*)  
173 were generated independently but are identical at the DNA sequence level. The following  
174 balancers were used: *tmC18[dpy-5(tm1236)]* I (Dejima *et al.* 2018), *mnC1[dpy-10(e128) unc-*  
175 *52(e444) umnIs32]* II, *nT1[qIs51]* (IV; V). The following transgene insertions were used:  
176 *itIs37[pie-1p::mcherry::histoneH2B::pie-1 3'UTR, unc-119(+)]* IV (McNally *et al.* 2006) and  
177 *ddIs128[ify-1::2xty1::egfp::3xflag(92C12) + unc-119(+)]* (Sarov *et al.* 2012).

### 178 *mScarlet and Dendra repair templates*

179 The repair templates used to create *lin-41*(*tn1892[mscarlet::tev::3xflag::lin-41]*) and *lin-*  
180 *41*(*tn1894[dendra::tev::flag::lin-41]*) were generated by Gibson assembly using the NEBuilder

181 HiFi DNA Assembly master mix (New England Biolabs, Ipswich, MA) and five different PCR  
182 products: (1) a *lin-41* 5' homology arm (~0.6 kb), (2) a codon-optimized mScarlet-I or a Dendra  
183 coding sequence with introns (~0.9 kb), (3) self-excising cassette (SEC)-containing sequences  
184 (~5.7 kb), (4) a *lin-41* 3' homology arm (~0.8 kb), and (5) vector backbone sequences (~2.6 kb).  
185 *lin-41* homology arms (1 and 4) were amplified from genomic DNA prepared from the wild type.  
186 SEC and vector sequences (3 and 5) were amplified from *ClaI* and *SpeI*-digested pDD268  
187 plasmid DNA (Dickinson *et al.* 2015). mScarlet-I and Dendra were amplified from the plasmids  
188 pMS050 (Addgene plasmid #91826), a gift from Bob Goldstein, and pEG545 (Griffin *et al.*  
189 2011), a gift from Geraldine Seydoux. Primer sequences are presented in File S1. All PCR  
190 products were initially column purified (Qiagen, Valencia, CA) and most of the plasmids  
191 recovered after assembly lacked the SEC fragment; only 10% and 5% of the mScarlet-I and  
192 Dendra repair constructs were complete, respectively. While making different *lin-41* repair  
193 constructs using the same method and many of the same PCR fragments, we found that gel  
194 purifying the SEC PCR product increased the inclusion of the SEC fragment to 80% of the  
195 assembled plasmids.

196         Constructs created by Griffin *et al.* (2011) that contain DENDRA-expressing sequences  
197 optimized for use in *C. elegans* (Gallo *et al.* 2010) are annotated in Addgene as containing  
198 DENDRA2 (e.g., pEG545, Addgene plasmid #40116 and pEG345, Addgene plasmid #40077).  
199 DENDRA2 is a modified form of DENDRA that has an important single amino acid change near  
200 the C-terminus (A224V) as well as a 5-amino acid insertion near the N-terminus (Gurskaya *et al.*  
201 2006; Chudakov *et al.* 2007). The relationship between DENDRA and DENDRA2 is most easily  
202 visualized using the fluorescent protein database [www.fpbases.org](http://www.fpbases.org) (Lambert 2019). We  
203 sequenced the pEG545 plasmid and confirmed that it encodes DENDRA; the DENDRA-coding

204 sequence lacks both the A224V amino acid change and the 5-amino acid insertion found in  
205 DENDRA2. Since we obtained pEG545 directly from the Seydoux lab, we also analyzed the  
206 Addgene-deposited sequences of pEG545 and pEG345. Although those sequences are  
207 incomplete, they confirm that each plasmid encodes DENDRA[A224]. As both plasmids have  
208 been used to generate many different fusion proteins labeled as containing DENDRA2 [e.g.,  
209 Herrera *et al.* (2016) and Rosu and Orna Cohen-Fix (2017)], this annotation error may be  
210 relatively common in the *C. elegans* literature.

### 211 ***Genome editing***

212 Plasmids that express guide RNAs (gRNAs) under the control of the U6 promoter were  
213 generated as described (Arribere *et al.* 2014). Repair templates used to tag genes with *gfp* were  
214 also generated as described (Dickinson *et al.* 2015). Repair templates used to tag genes with  
215 mSCARLET-I and DENDRA were generated as described in the previous section. Genome  
216 editing was performed by injecting wild-type adult gonads with a DNA mix containing a repair  
217 template (10 ng/μl), one or more gRNA plasmids (25 ng/μl each), Cas9-expressing plasmid  
218 (pDD162, 50 ng/μl), and injection marker (pMyo2::Tdtomato, 4 ng/μl) and selecting for repairs  
219 and selection cassette excisions using standard methods (Dickinson *et al.* 2015). Null mutations  
220 in *lin-41* are both Dumpy (Dpy) and sterile (Slack *et al.* 2000; Spike *et al.* 2014a). None of the  
221 animals homozygous for the *mScarlet*<sup>SEC</sup>*lin-41*, *Dendra*<sup>SEC</sup>*lin-41* and *GFP*<sup>SEC</sup>*lin-41*  
222 repairs were Dpy, but some were sterile, consistent with the interpretation that the insertion of  
223 each SEC (self-excising cassette) at the 5' end of the *lin-41* gene created reduction-of-function  
224 rather than null alleles of *lin-41*. Each *lin-41* repair was balanced with *tmC18* and the SEC was  
225 removed from the *lin-41* locus in balanced heterozygotes. Fluorescently tagged *lin-41* alleles  
226 were homozygous fertile after SEC excision. All edited loci were validated by sequencing the

227 repair junctions using PCR products as templates. At least two alleles derived from  
228 independently injected parents were isolated and assigned allele names; all alleles are available  
229 upon request.

### 230 *Antibody staining*

231 Dissected gonads stained with the rabbit anti-GLD-1 primary antibody (1:200 or 1:300 dilution;  
232 Jan *et al.* 1999) were fixed in 1% paraformaldehyde for 10 min, with a 5-min post fix step in ice-  
233 cold methanol as previously described (Rose *et al.* 1997; Spike *et al.* 2018). Primary antibodies  
234 were detected using Cy3-conjugated donkey anti-rabbit secondary antibodies (1:500 dilution;  
235 Jackson ImmunoResearch, West Grove, PA).

### 236 *Microscopy and image analysis*

237 Microscope images in Figures 4 and S2 were acquired on a Carl Zeiss motorized Axioplan 2  
238 microscope with a 63x Plan-Apochromat (numerical aperture 1.4) objective lens using an  
239 AxioCam MRm camera and AxioVision software (Carl Zeiss, Thornwood, NY). Microscope  
240 images in Figures 5I-L, S6A-F and S7 were acquired on a Nikon Ni-E microscope with either a  
241 Plan Apo  $\lambda$  60x (numerical aperture 1.4) objective or a Plan Fluor 40x Oil (numerical aperture  
242 1.3) objective using NIS elements (Nikon Inc., Melville, NY). All the remaining microscope  
243 images were acquired on a Nikon Ti2 inverted confocal microscope with a Plan ApoIR 60x  
244 objective (numerical aperture 1.27), motorized stage and Galvano scanner using NIS elements  
245 (Nikon Inc., Melville, NY). When using the Nikon Ti2 microscope, the large image function of  
246 NIS elements was used to acquire images that show the entire germline. We quantified the  
247 average fluorescence intensity in selected areas of images using the measure function of ImageJ  
248 (Schneider *et al.* 2012). Each measurement was background corrected using the average

249 fluorescence intensity of a nearby area outside the body of the worm. Multiple images were  
250 analyzed per genotype, as specified in the text.

251 ***Photoconverting*** <sup>Green</sup>*DENDRA::LIN-41* to <sup>Red</sup>*DENDRA::LIN-41*

252 Worms were mounted without anesthetic on 10% agarose pads in a 1:1 solution of M9 buffer and  
253 0.1  $\mu$ M polystyrene beads (Polysciences, Inc., Warrington, PA) essentially as described (Rosu  
254 and Cohen-Fix 2020). Photoactivation and imaging was performed using the Nikon Ti2 inverted  
255 confocal microscope equipped as described in the previous section. A region of interest  
256 encompassing the -1 oocyte was selected for photoactivation using the 405 nm laser at 10%  
257 power for 31.25 seconds (125 loops at 4 frames per second) and a large pinhole (173.69 microns)  
258 to promote DENDRA photoconversion throughout the oocyte. After photoactivation, animals  
259 were allowed to recover on NGM plates seeded with OP50-1 bacteria for either 60 min or 100  
260 min and then mounted a second time. Confocal settings optimized to image oocytes after  
261 photoconversion were used to collect images of the <sup>Green</sup>DENDRA::LIN-41 and  
262 <sup>Red</sup>DENDRA::LIN-41 in oocytes and embryos at all stages of the experiment: before  
263 photoactivation, after photoactivation, and after recovery.

264 Although the conditions used for photoactivation were generally compatible with oocyte  
265 meiotic maturation and ovulation, our experimental manipulations sometimes interfered with  
266 these events. For example, one *lin-41(tn1894)* animal failed to move after recovery, suggesting  
267 that it might have been damaged while mounting on or recovering from the agarose pad.

268 <sup>Red</sup>DENDRA::LIN-41 was still detectable in the -1 and -2 oocytes of the photoconverted arm  
269 after a 100-min recovery period, indicating that the converted oocytes in this damaged animal  
270 had not matured or ovulated. The other *lin-41(tn1894)* animals (n=5) survived the experimental

271 manipulations and exhibited exclusively green oocytes in the -1 and -2 positions in each  
272 photoconverted arm (n=6 arms, the -1 oocytes of both arms were converted in one animal),  
273 confirming that oocytes had matured and been ovulated into the uterus during the recovery  
274 period (60 min (n=2) or 100 min (n=4)). All *lin-41(tn1894); sel-10(ok1632)* animals survived  
275 our experimental manipulations (n=4 animals), and most of the photoconverted arms had  
276 exclusively green oocytes in the -1 and -2 positions (n=4/5 arms, the -1 oocytes of both arms  
277 were converted in one animal) and one or two red embryos in the uterus after the recovery  
278 period. The sole exception was in an animal that laid only 2 eggs during the 100-min recovery  
279 period and appeared to be sickly. This animal had a bright red 1-cell stage embryo in the +1  
280 position and a fainter red oocyte in the -1 position. The -1 oocyte converted in this gonad arm  
281 must have experienced a substantial temporal delay prior to oocyte maturation and ovulation, as  
282 a shorter (60 min) recovery period was sufficient for two ovulation events in the healthier *lin-*  
283 *41(tn1894); sel-10(ok1632)* animals.

#### 284 ***itIs37 puf-3(tn1820) and puf-11(tn1824) puf-3(tn1820) double mutants***

285 Crosses with *puf-11(tn1824)* and *puf-3(tn1820)* established that the *itIs37[pie-*  
286 *lp::mcherry::histoneH2B::pie-1 3'UTR, unc-119(+)]* insertion on chromosome IV is tightly  
287 linked to *puf-11* and more loosely linked to *puf-3*. 0 of 72 progeny from *itIs37 + / + puf-*  
288 *11(tn1824)* parents carried a recombinant *itIs37 puf-11(tn1824)* chromosome, while 5 of 64  
289 progeny from *itIs37 + / + puf-3(tn1820)* parents carried a recombinant *itIs37 puf-3(tn1820)*  
290 chromosome. Together, these observations suggested that *itIs37* is ~7.8 map units to the left of  
291 *puf-3*, in good agreement with the relative genetic positions of *puf-11* and *puf-3* described in  
292 WormBase (<http://www.wormbase.org>, release WS278; Harris *et al.* 2014). We utilized *unc-*

293 *22(e66)*, which causes a homozygous Uncoordinated (Unc) phenotype and is located in-between  
294 *puf-11* and *puf-3*, to construct the *puf-11(tn1824) puf-3(tn1820)* double mutant. Animals carrying  
295 *itIs37 puf-3(tn1820)* and *puf-11(tn1824) unc-22(e66)* recombinant chromosomes were mated  
296 with each other. Animals with one copy of each chromosome were selected and allowed to self-  
297 fertilize. In the next generation, non-Unc-22 animals were examined for *itIs37*-derived  
298 mCHERRY::HISTONE expression using fluorescence microscopy. A single *itIs37*-negative  
299 animal was identified among the 168 non-Unc animals examined, and this animal segregated  
300 approximately one quarter Unc progeny in the next generation. Based on the mapping data, we  
301 anticipated that this rare animal carried either a *puf-11(tn1824) puf-3(tn1820)* or a *puf-11(+)* *puf-*  
302 *3(tn1820)* recombinant chromosome in *trans* to the parental *puf-11(tn1824) unc-22(e66)*  
303 chromosome. Animals homozygous for the recombinant chromosome were analyzed using  
304 primers that produce allele-specific PCR products (File S1) and found to carry both *puf-*  
305 *11(tn1824)* and *puf-3(tn1820)*.

### 306 ***RNA interference***

307 Gene-specific RNA interference (RNAi) was performed by feeding *C. elegans* with double-  
308 stranded RNA (dsRNA)-expressing *E. coli* (Timmons and Fire 1998) at 22 °C using the RNAi  
309 culture media described by Govindan *et al.* (2006). RNAi clones were obtained from Source  
310 BioScience (Nottingham, UK), and the identities of important RNAi clones were verified by  
311 DNA sequencing (see File S1 for details). Exposure to dsRNA-expressing *E. coli* was initiated  
312 during the fourth larval stage and animals were examined and imaged after 2 days. Under these  
313 RNAi conditions and at the time-point analyzed, all *cdk-1(RNAi)* animals produced arrested 1-  
314 cell embryos and therefore had a strong *cdk-1(RNAi)* phenotype (see Boxem *et al.* 1999). Using  
315 the same RNAi conditions, the gonad arms of *wee-1.3(RNAi)* animals exhibited a range of oocyte



316 phenotypes. Gonads with a mild *wee-1.3(RNAi)* phenotype have relatively large and normal-  
317 appearing oocytes that occupy approximately normal positions with respect to each other and to  
318 the spermatheca. Gonads with strong *wee-1.3(RNAi)* phenotype have small, sometimes indistinct  
319 oocytes or a mass of oocyte-like material near the spermatheca. Burrows *et al.* (2006) also noted  
320 that prolonged RNAi results in small oocytes, consistent with the idea that this phenotype is  
321 caused by a strong response to *wee-1.3(RNAi)*. GFPs::LIN-41 is prematurely degraded in animals  
322 with both weak and strong *wee-1.3(RNAi)* phenotypes (Spike *et al.* 2014a, 2018). In the screen  
323 for E3 ubiquitin ligases that degrade PUF-3::GFP, we did not exclusively use RNAi to test the  
324 SCF subunit CUL-2. Since our *cul-2(RNAi)* clone does not trigger a good RNAi response (Spike  
325 *et al.* 2018), we also examined *cul-2(or209ts); puf-3(tn1820[puf-3::gfp::tev::3xflag])* adults 1  
326 day after they were upshifted to 25 °C as L4-stage larvae. All other ubiquitin ligase subunits  
327 were screened using RNA interference alone.

### 328 ***Western blots***

329 Each lane was loaded with a protein lysate made from adult worms picked into 10 microliters of  
330 phosphate-buffered saline (PBS) containing proteinase inhibitors (2x complete EDTA-free;  
331 Millipore-Sigma, St. Louis, MO). Whole-worm lysates were frozen at -80 °C and prepared for  
332 electrophoresis by adding LDS sample buffer supplemented with a reducing agent (Invitrogen,  
333 Carlsbad, CA). Immediately after adding the sample buffer, the samples were heated at 70 °C  
334 and vortexed multiple times prior to loading on a gel. Lysates were made from 40 Day 1 adult  
335 worms (24 hours past the L4 stage at 20 °C) with a few exceptions. Some lysates expressing  
336 CYB-1::GFP were made from 50 instead of 40 worms (hermaphrodites in Figures 7A and S5B;  
337 males in Figures 7B and S5D). In addition, the mated females used for lysates were not  
338 developmentally staged (Figure S5C). Instead, gravid females were selected from mixed-stage

339 plates. Proteins were separated using 3–8% Tris-Acetate gels (Invitrogen, Carlsbad, CA) and  
340 visualized after western blotting. Blots were blocked with 5% nonfat dried milk. The primary  
341 antibodies used were mouse anti-FLAG M2 (Millipore-Sigma) at a 1:2,000–1:4,000 dilution and  
342 rabbit anti-GFP NB600-308 (Novus Biologicals, Littleton, CO) at a 1:4,000 dilution. The  
343 secondary antibodies used were peroxidase-conjugated goat anti-mouse (Thermo Scientific,  
344 Waltham, MA) at a 1:30,000 dilution or peroxidase-conjugated donkey anti-rabbit (Thermo  
345 Scientific) at a 1:5,000 dilution. Detection was performed using SuperSignal West Femto  
346 Maximum Sensitivity Substrate and CL-XPosure film (Thermo Scientific).

#### 347 *eGFP, mSCARLET-I and DENDRA fusion protein tag sequences*

348 The predicted amino sequence and molecular mass of each protein tag is presented in File S2 for  
349 reference. All GFP tags express the GFP[S65C] enhanced GFP variant commonly used in *C.*  
350 *elegans* (Green *et al.* 2008). Most also contain the apparently neutral GFP[Q80R] change likely  
351 introduced into the original GFP cDNA sequence by PCR error (Tsien 1998).

#### 352 *Data availability*

353 All alleles and strains (Table S1), plasmids (File S1) and Sanger sequencing files are available  
354 upon request. Primer sequences are provided in File S1. File S2 contains the amino acid  
355 sequences of fluorophore tags used in this work. Supplemental materials are available at  
356 Figshare: <https://doi.org/>

357

358

## RESULTS AND DISCUSSION

### 359 *SEL-10 is present in the cytoplasm and nucleoplasm of oogenic germ cells*

360 SEL-10/Cdc4/FBW7 is a highly conserved F-box protein; it is the substrate-recognition subunit

361 of a Skp, Cullin, F-box (SCF)-containing E3 ubiquitin ligase complex that promotes the

362 ubiquitination and degradation of specific substrates (reviewed in Deshaies and Ferrell 2001;

363 Welcker and Clurman 2008). In *C. elegans*, SEL-10 functions in the oogenic germline and

364 during the OET to promote the timely elimination of the cytoplasmic RNA-binding proteins

365 GLD-1 and LIN-41 at different stages of oogenesis (Kisielnicka *et al.* 2018; Spike *et al.* 2018).

366 Consistent with this idea, *sel-10* mRNA is expressed throughout the oogenic germlines of adult

367 hermaphrodites and the *sel-10* 3' UTR is permissive for the translation of green fluorescent

368 protein (GFP) in pre-meiotic and meiotic cells during oogenesis (Kisielnicka *et al.* 2018).

369 However, the expression of SEL-10 has not been reported in oocytes or in any other region of the

370 *C. elegans* germline, possibly because SEL-10 expression constructs were examined in the

371 context of extrachromosomal arrays (Ding *et al.* 2007; Dorfman *et al.* 2009), which can silence

372 the expression of germline genes in *C. elegans* (Kelly *et al.* 1997). To avoid this technical issue,

373 we used genome editing to generate new alleles of *sel-10* that have a GFP-tag fused to the SEL-

374 10 protein at both the amino-terminus (N-terminus, GFP<sub>F</sub>::SEL-10 in Figure 1) and carboxyl-

375 terminus (C-terminus, SEL-10::GFP<sub>F</sub> in Figure 1). In the figures, and where needed for textual

376 clarity, we will indicate the presence and relative position of a 3xFLAG or an S epitope tag in a

377 fusion protein with an F or S subscript, respectively. The alleles that express GFP::SEL-10, SEL-

378 10::GFP, and many of the other fusion proteins used in this work, are shown in Figure S1.

379           The pattern of GFP expression from each *sel-10* allele confirms that SEL-10 is expressed  
380 throughout the oogenic germline of adult hermaphrodites and in early embryos (Figure 1, C and  
381 E). GFP::SEL-10 and SEL-10::GFP are present in the nucleoplasm and cytoplasm of oocytes and  
382 distal germ cells, but show slightly different patterns of localization. GFP::SEL-10 is enriched in  
383 the nucleoplasm relative to the cytoplasm at all stages of germ cell development (Figure 1C).  
384 SEL-10::GFP is present at similar levels in the nucleoplasm and cytoplasm of distal germ cells  
385 and becomes enriched in the nucleoplasm of growing oocytes (Figure 1E). Using confocal  
386 images collected with identical settings, we measured 23% and 43% increases in background-  
387 corrected cytoplasmic fluorescence in the rachis and the -3 oocyte, respectively, in SEL-10::GFP  
388 animals relative to GFP::SEL-10 animals ( $P < 0.01$ ,  $n = 7$  images per genotype). However, nuclear  
389 fluorescence in the -3 oocyte of each strain was not significantly different ( $P > 0.1$ ). We conclude  
390 that, at least in the oogenic germline, SEL-10::GFP appears to be more abundant than GFP::SEL-  
391 10 and more likely to reside in the cytoplasm.

392           The different patterns of GFP::SEL-10 and SEL-10::GFP localization might reflect the  
393 disruption or alteration of SEL-10 function by the inserted protein tags. We examined the  
394 accumulation of LIN-41 and GLD-1 in animals homozygous for each GFP-tagged allele of *sel-*  
395 *10* to address this possibility. LIN-41 was monitored using *lin-41(tn1892[mscarlet::3xflag::lin-*  
396 *41])*, a new allele of *lin-41* that produces a fusion protein with an mSCARLET-tag fused to the  
397 N-terminus of LIN-41 (Figure S1B; mSC<sub>F</sub>::LIN-41). Endogenous GLD-1 levels were analyzed  
398 by immunostaining. mSCARLET::LIN-41 is strongly expressed in wild-type and *sel-10(ok1632)*  
399 loss-of-function mutant oocytes (Figure 1, A and B). mSCARLET::LIN-41 is down-regulated in  
400 wild-type embryos (Figure 1A), but persists at elevated levels in the embryos produced by *sel-*  
401 *10(ok1632)* mutant animals (Figure 1B). The downregulation of mSCARLET::LIN-41 protein

402 expression during the OET is therefore SEL-10-dependent, as described for endogenous LIN-41  
403 and a GFP-tagged LIN-41 fusion protein (Figure S1B; GFP<sub>S</sub>::LIN-41; Spike *et al.* 2018).  
404 mSCARLET::LIN-41 is downregulated in the embryos of GFP::SEL-10-expressing animals (*sel-*  
405 *10(tn1875)*, Figure 1D), but persists at elevated levels in the embryos of SEL-10::GFP-  
406 expressing animals (*sel-10(tn1817)*, Figure 1F). Similar results were observed with GLD-1  
407 (Figure S2). GLD-1 is downregulated as developing oocytes exit pachytene near the loop region  
408 (Figure S2, A and C), and this process is impaired in *sel-10(lf)* mutants, resulting in elevated  
409 levels of GLD-1 in proximal oocytes (Kisielnicka *et al.* 2018; Spike *et al.* 2018). GLD-1 is  
410 downregulated in the oocytes of GFP::SEL-10-expressing animals (*sel-10(tn1875)*, Figure S2B),  
411 but persists at elevated levels in the oocytes of SEL-10::GFP-expressing animals (*sel-10(tn1816)*,  
412 Figure S2D). We conclude that at least two of the normal functions of SEL-10 are compatible  
413 with the insertion of a GFP tag at the N-terminus of SEL-10 but are disrupted by the insertion of  
414 a GFP tag at the SEL-10 C-terminus. Furthermore, these observations suggest that the  
415 nucleoplasm-enriched localization pattern of GFP::SEL-10 shown in Figure 1C likely represents  
416 the correct localization pattern of SEL-10 in the oogenic germline. Although known targets of  
417 SEL-10 in the *C. elegans* germline are predominantly cytoplasmic (e.g., LIN-41, GLD-1 and  
418 CPB-3 (Kisielnicka *et al.* 2018; Spike *et al.* 2018)), orthologs of SEL-10 are present in the  
419 nucleoplasm in *S. cerevisiae* (Cdc4p) (Choi *et al.* 1990) and in both the nucleoplasm and  
420 cytoplasm in humans (FBW7 $\alpha$  and FBW7 $\beta$  isoforms, respectively) (Welcker *et al.* 2004).

421

422

423

424 ***SEL-10 is required to degrade LIN-41 during the OET***

425 LIN-41 disappears rapidly upon the onset of meiotic maturation. We previously  
426 hypothesized that LIN-41 is phosphorylated at this stage and recognized by a SEL-10-containing  
427 E3 ubiquitin ligase that targets LIN-41 for proteolysis (Spike *et al.* 2018). To confirm that SEL-  
428 10 promotes the degradation of LIN-41 during the OET, we generated *lin-*  
429 *41(tn1894[dendra::3xflag::lin-41])*, a new allele of *lin-41* that produces a protein with a  
430 DENDRA-tag fused to the LIN-41 N-terminus (Figure S1B; DND<sub>F</sub>::LIN-41) and crossed it into  
431 a *sel-10(ok1632)* mutant background. Photoactivation irreversibly converts the fluorescence  
432 emitted by DENDRA from green to red (<sup>Green</sup>DENDRA and <sup>Red</sup>DENDRA, respectively)  
433 (Gurskaya *et al.* 2006). The <sup>Green</sup>DENDRA::LIN-41 present in the -1 oocytes of *sel-10(ok1632)*  
434 and *sel-10(+)* animals was targeted for conversion to <sup>Red</sup>DENDRA::LIN-41 using a 405 nm  
435 laser. Robust photoconversion was observed in the -1 oocyte, with a small amount of red  
436 fluorescence sometimes visible in the adjacent cytoplasm of the -2 oocyte (Figure 2, A, B, F,  
437 and G). After a suitable recovery period to permit oocyte maturation, ovulation, and some  
438 embryonic development, bright <sup>Red</sup>DENDRA::LIN-41 was evident in a single embryo in the  
439 uterus of *sel-10(ok1632)* animals (Figure 2, C-E; n=5/5). In general, we noted that the next-  
440 youngest embryo (or -1 oocyte in one animal, see Materials and Methods) also contained  
441 <sup>Red</sup>DENDRA::LIN-41 (n=4/5), but at a much lower level. We did not observe bright  
442 <sup>Red</sup>DENDRA::LIN-41 in any of the embryos in the uteri of *sel-10(+)* animals (n=6), although we  
443 sometimes saw an embryo with a slight haze of red fluorescence that we hypothesized might be  
444 derived from the converted <sup>Red</sup>DENDRA::LIN-41 -1 oocyte (Figure 2, H and I). Relative to  
445 these *sel-10(+)* embryos, we measured a 6- to 10-fold higher level of background-corrected  
446 <sup>Red</sup>DENDRA::LIN-41 fluorescence in the brightest *sel-10(ok1632)* embryos (n=4 of each

447 genotype). Together, these results indicate that the fluorescently tagged <sup>Red</sup>DENDRA::LIN-41  
448 observed in *sel-10(ok1632)* embryos originates in oocytes and confirm that LIN-41 is degraded  
449 during the OET in wild-type animals.

450

#### 451 ***PUF-3 and PUF-11 are degraded during the OET***

452 PUF-3 and PUF-11 are nearly identical Pumilio-family RNA-binding proteins that function  
453 redundantly with respect to normal embryonic development in *C. elegans* (Hubstenberger *et al.*  
454 2012; Haupt *et al.* 2020). PUF-3 and PUF-11 proteins and mRNAs co-purify with LIN-41-  
455 containing ribonucleoprotein (RNP) complexes (Tsukamoto *et al.* 2017). Furthermore, LIN-41  
456 and PUF-3/11 were each identified as factors important for the 3'UTR-mediated translational  
457 repression of the Rbfox-related RNA-binding protein SPN-4 in oocytes (Hubstenberger *et al.*  
458 2012; Tsukamoto *et al.* 2017). These observations suggest that LIN-41, PUF-3, and PUF-11  
459 function together in developing oocytes. We confirmed that PUF-3 and PUF-11 are expressed in  
460 oocytes, as described (Haupt *et al.* 2020), and also examined the expression patterns of PUF-3  
461 and PUF-11 during the oocyte-to-embryo transition. We created new alleles of *puf-3* and *puf-11*  
462 that fuse a GFP-tag to the C-terminus of each PUF protein (Figure S1C; PUF-3::GFP<sub>F</sub> and PUF-  
463 11::GFP<sub>F</sub>) and found that PUF-3 and PUF-11 are eliminated during the OET in a manner that  
464 resembles LIN-41 (Figure 3). PUF-3::GFP and PUF-11::GFP are abundant in oocytes, but the  
465 expression of each protein is strongly diminished soon after oocyte meiotic maturation and  
466 ovulation (Figure 3, A and D; Figure S3, A and B). Consequently, PUF-3::GFP and PUF-  
467 11::GFP expression appear to be largely absent from embryos (Figure 3A) or limited to a single  
468 young embryo (Figure 3D and Figure S3, A and B). A similar pattern is observed with

469 GFP::LIN-41 and mSCARLET::LIN-41 (Spike *et al.* 2018; Figure 1A). Moreover, PUF-3::GFP  
470 or PUF-11::GFP and mSCARLET::LIN-41 identify the same young embryos (if present, as in  
471 Figure 3, D and E;  $n \geq 7$  animals of each genotype imaged as shown). To determine when PUF-3  
472 is eliminated from embryos, we examined PUF-3::GFP in oocytes and embryos that express an  
473 mCHERRY::HISTONE fusion protein. Relative to the adjacent -1 oocyte, PUF-3::GFP levels  
474 are substantially reduced in meiotic embryos that are in metaphase I (Figure 3, G–J) and most  
475 PUF-3::GFP appears to be eliminated by the end of the first meiotic division (Figure 3K). This  
476 roughly corresponds to the time window during which LIN-41 is degraded; time-lapse imaging  
477 previously demonstrated that GFP::LIN-41 is dramatically reduced by the end of the first meiotic  
478 division (Spike *et al.* 2018).

479         While LIN-41, PUF-3 and PUF-11 are strongly reduced soon after meiotic maturation  
480 and ovulation, each protein has a distinct pattern of expression in the adult germline (Figure 3,  
481 A–F). For example, the accumulation of PUF-3::GFP and PUF-11::GFP appears to peak at a  
482 later stage of oogenesis than mSCARLET::LIN-41 (Figure 3, C and F). In addition, PUF-  
483 11::GFP is distinctly more abundant than PUF-3::GFP in the distal germline (compare Figure 3,  
484 A and D). Haupt *et al.* (2020) also observed higher levels of PUF-11 in the distal germline using  
485 alleles that express V5 epitope-tagged PUF-3 and PUF-11 proteins. We screened for and  
486 identified a recombinant that expresses both PUF-3::GFP and PUF-11::GFP using standard  
487 genetic methods (see Materials and Methods). As expected from the individual expression  
488 patterns, GFP expression was higher in the oocytes of these animals [*puf-11(tn1824) puf-*  
489 *3(tn1820)* genotype] than in the oocytes of either parent [*puf-11(tn1824)* or *puf-3(tn1820)* alone],  
490 and the level of GFP expression in the distal germline was similar to the PUF-11::GFP-  
491 expressing strain (Figure S3, A–C). *puf-11(tn1824) puf-3(tn1820)* animals are overtly wild-type;



492 they are homozygous viable and fertile, with a brood size similar to the wild type ( $333 \pm 40$   
493 larvae,  $n=15$  animals at  $20^\circ\text{C}$ ). In addition, most of the embryos produced by *puf-11(tn1824)*  
494 *puf-3(tn1820)* animals hatch ( $\sim 1\%$  embryonic lethality). Since animals that are doubly  
495 homozygous for deletion alleles of *puf-11* and *puf-3* [*puf-11(q971) puf-3(q966)* animals] exhibit  
496 maternal-effect embryonic lethality (Haupt *et al.* 2020), the GFP-tagged alleles of *puf-11* and  
497 *puf-3* must retain some wild-type function. As a more stringent test, we crossed homozygous *puf-*  
498 *11(tn1824) puf-3(tn1820)* males to balanced *puf-11(q971) puf-3(q966) / nT1[qIs51]*  
499 hermaphrodites to generate *puf-11(tn1824) puf-3(tn1820) / puf-11(q971) puf-3(q966)* animals.  
500 Animals with this genotype produced many embryos that were viable ( $n=25$  animals). We  
501 conclude that the GFP tag inserted at the C-terminus of PUF-3 and PUF-11 is largely compatible  
502 with the function of each protein.

### 503 ***PUF-3 and PUF-11 are degraded in response to active CDK-1***

504 LIN-41 is degraded in response to meiotic resumption and the activation of the cyclin-dependent  
505 kinase CDK-1 (Spike *et al.* 2014a, 2018). Likewise, we find that using RNA interference (RNAi)  
506 to strongly reduce CDK-1 activity causes PUF-3::GFP and PUF-11::GFP to persist in embryos  
507 (Figure 4, A and E;  $n>65$  for each PUF::GFP with 100% penetrance). Furthermore, a strong  
508 RNAi-mediated reduction in the activity of the WEE-1.3 kinase, a negative regulator of CDK-1  
509 (Burrows *et al.* 2006), causes oocytes to downregulate PUF-3::GFP and PUF-11::GFP  
510 prematurely (Figure 4, B and F). The latter phenotype was partially penetrant; it was observed in  
511 32/46 of the PUF-3::GFP and 25/44 of the PUF-11::GFP-expressing *wee-1.3(RNAi)* gonads and  
512 mainly seen in *wee-1.3(RNAi)* animals with highly abnormal oocytes. GFP::LIN-41 is also  
513 degraded prematurely after *wee-1.3(RNAi)*, but this can be seen in gonads with relatively normal  
514 oocytes (Spike *et al.* 2014a), suggesting that LIN-41 might be more sensitive to CDK-1 activity.

515 We tested this idea by treating animals that co-express mSCARLET::LIN-41 and PUF-11::GFP  
516 with *wee-1.3(RNAi)* and selectively examining gonads with large, well-organized oocytes. In  
517 these animals, mSCARLET::LIN-41 was down-regulated in younger (more distal) oocytes  
518 (Figure 4I) and, as a consequence, prematurely eliminated from oocytes more frequently than  
519 PUF-11::GFP (in 11/12 instead of 6/12 gonads, respectively). Collectively, these results indicate  
520 that active CDK-1 promotes the elimination of PUF-3 and PUF-11 and suggest that LIN-41  
521 might be more sensitive to the dysregulatory effects of *wee-1.3(RNAi)*.

### 522 ***SCF<sub>SEL-10</sub> and APC ubiquitin ligases do not target PUF-3 for degradation***

523 PUF-3 and PUF-11 are components of LIN-41 RNPs and appear to be eliminated in response to  
524 the same signal and at a similar time as LIN-41. These observations suggested that PUF-3 and  
525 PUF-11 might be degraded as a consequence of LIN-41 degradation. We therefore asked  
526 whether they are targeted for elimination by the same SCF E3 ubiquitin ligase. LIN-41 persists in  
527 early embryos after the RNAi-mediated knockdown of the highly similar Skp-related genes *skr-1*  
528 and *skr-2*, the Cullin *cul-1*, the F-box substrate recognition subunit *sel-10* and in the *sel-10(lf)*  
529 mutants *sel-10(ok1632)* and *sel-10(ar41)* (Spike *et al.* 2018). However PUF-3::GFP and PUF-  
530 11::GFP are eliminated normally from the embryos of *lon-3(e2175) sel-10(ar41)* mutant animals  
531 (Figure 4, C, D, G, and H) and after *skr-1/2(RNAi)* ( $n > 30$  animals for each PUF::GFP fusion  
532 protein) and *cul-1(RNAi)* ( $n \geq 10$  animals for each PUF::GFP fusion protein). A distinct, SEL-10-  
533 independent mechanism must therefore promote the elimination of PUF-3 and PUF-11 from  
534 early embryos. We conclude that the degradation of PUF-3 and PUF-11 during the OET is not a  
535 consequence of the SEL-10-dependent degradation of LIN-41, consistent with the idea that  
536 multiple mechanisms remodel and take apart oocyte RNPs during the OET.

537 An interesting feature of LIN-41 degradation is that it occurs even when the metaphase-  
538 to-anaphase transition of the first meiotic division is blocked by disrupting the function of the  
539 anaphase-promoting complex (APC) (Spike *et al.* 2014a). This feature distinguishes LIN-41  
540 from proteins such as IFY-1/Securin (Kitagawa *et al.* 2002; Wang *et al.* 2013) and CYB-  
541 1/Cyclin B1 (Liu *et al.* 2004), which are degraded slightly later than LIN-41 in an APC-  
542 dependent fashion. Therefore, we tested whether the metaphase-to-anaphase transition regulates  
543 the elimination of PUF-3::GFP by impairing the function of two key members of the APC, *mat-*  
544 *1/Apc3* and *emb-30/Apc4* (Furuta *et al.* 2000; Shakes *et al.* 2003). *mat-1(RNAi)* caused fully  
545 penetrant 1-cell embryonic arrest, but did not delay or prevent the elimination of PUF-3::GFP  
546 from embryos (n = 25 animals). Likewise, PUF-3::GFP disappears normally from the embryos of  
547 *emb-30(tn377ts)* mutants shifted to 25 °C at the L4 stage (n > 25); these embryos arrest in  
548 metaphase during the first meiotic division (Furuta *et al.* 2000). PUF-11::GFP protein was not  
549 tested using these assays. We conclude that, as for LIN-41, the elimination of PUF-3 from early  
550 embryos does not require the activity of the APC. However, unlike LIN-41, the elimination of  
551 PUF-3::GFP and PUF-11::GFP from embryos is *sel-10* independent.

### 552 ***Proteolysis and translational repression limit the expression of RNA-binding proteins during*** 553 ***the OET***

554 Many of the oocyte-expressed proteins degraded during the OET in *C. elegans* are RNA-binding  
555 proteins that regulate translation (reviewed by Robertson and Lin 2013, 2015). These RNA-  
556 binding proteins include LIN-41 and the Pumilio/FBF-family RNA-binding proteins PUF-3 and  
557 PUF-11. PUF-3 and PUF-11 function redundantly, repress the translation of specific targets in  
558 oocytes, and play important roles in germline stem cells and embryonic development in *C.*  
559 *elegans* (Hubstenberger *et al.* 2012; Haupt *et al.* 2020). Since PUF-3 and PUF-11 appear to be  
560 degraded soon after meiotic maturation (Figure 3), it seems likely that the maternal-effect

561 embryonic lethality caused by an absence of both proteins is due to mRNA translation defects in  
562 developing oocytes. Interestingly, the timing and regulation of PUF-3 and PUF-11 degradation  
563 appear to be temporally and molecularly coordinated with meiotic maturation and strongly  
564 resemble what we have described for LIN-41 (Spike *et al.* 2018 and Figure 3). The resemblances  
565 include a requirement for active CDK-1 (Figure 4), which is essential for entry into meiotic M-  
566 phase (Boxem *et al.* 1999, Burrows *et al.* 2006), and independence from APC ubiquitin ligase  
567 subunits that promote the subsequent metaphase-to-anaphase transition (Furuta *et al.* 2000;  
568 Shakes *et al.* 2003). Additional connections between LIN-41, PUF-3, and PUF-11 include the  
569 identification of each protein and mRNA in purified LIN-41 RNPs, and the identification of  
570 LIN-41 and PUF-3/11 as factors important for the 3'UTR-mediated translational repression of a  
571 common target, the Rbfox-related RNA-binding protein SPN-4 (Hubstenberger *et al.* 2012;  
572 Tsukamoto *et al.* 2017). These disparate observations suggest that LIN-41, PUF-3, and PUF-11  
573 might collaborate and function, at least in part, as components of a regulatory RNP to inhibit the  
574 translation of SPN-4 in developing oocytes. Previously, we proposed that LIN-41 is inactivated  
575 as a translational repressor prior to its degradation (Spike *et al.* 2018). Since *cdk-1(RNAi)* does  
576 not reduce or eliminate SPN-4::GFP expression in early embryos (Tsukamoto *et al.* 2017), we  
577 suggest that PUF-3 and PUF-11 are likewise inactivated prior to their degradation. Thus, we  
578 suggest that the activity of a LIN-41/PUF-3/PUF-11 RNP is down-regulated in a CDK-1-  
579 independent manner near the end of oogenesis. This model is consistent with the observation that  
580 SPN-4::GFP expression in embryos is scarcely affected when LIN-41 degradation is inhibited  
581 (Spike *et al.* 2018). A detailed understanding of the SEL-10-independent mechanism underlying  
582 the degradation of PUF-11 and PUF-3 would enable tests of this model.

583

584 ***ETC-1/Hul5/UBE3C promotes efficient protein clearance during the OET***

585 Since PUF-3/11 are degraded in a SEL-10-independent manner, and because regulated protein  
586 degradation often requires ubiquitination (reviewed by Dikic *et al.* 2017), we tested whether a  
587 different ubiquitin ligase might promote the elimination of PUF-3::GFP from embryos. Many  
588 potential ubiquitin ligases have been identified in *C. elegans*, including (1) multi-subunit E3s  
589 (SCF-type, APC), (2) HECT-domain E3s, (3) U-box E3s, and (4) more than 100 RING-finger  
590 proteins that might function as monomeric E3s (Kipreos *et al.* 2005). We performed a small-  
591 scale RNAi screen that targeted the first three classes of ubiquitin ligases and identified the  
592 HECT-domain ubiquitin ligase ETC-1/Hul5/UBE3C as a promising candidate. When animals  
593 expressing both mSCARLET::LIN-41 and PUF-3::GFP [*lin-41(tn1892); puf-3(tn1820)*  
594 genotype] were exposed to *etc-1(RNAi)*, there was no discernable change in mSCARLET::LIN-  
595 41 degradation, yet elevated levels of GFP were observed in multiple young embryos (n=24/24  
596 animals). This suggested that *etc-1* knock down specifically interferes with the elimination of  
597 oocyte-expressed PUF-3::GFP but not mSCARLET::LIN-41. We confirmed these RNAi-based  
598 observations with *etc-1(gk5182)*, a predicted loss-of-function allele, which introduces a  
599 premature stop codon, generated by the *C. elegans* Reverse Genetics Core Facility at the  
600 University of British Columbia (The *C. elegans* Deletion Mutant Consortium 2012). *etc-*  
601 *1(gk5182); puf-3(tn1820)* and *etc-1(gk5182); puf-11(tn1824)* animals exhibit GFP fluorescence  
602 in multiple embryos compared to *etc-1(+)* controls (Figure 5, A–D), while expanded  
603 mSCARLET is not observed in *lin-41(tn1892); etc-1(gk5182)* animals (Figure 5, G and H).

604 ETC-1 was proposed to function as an E3 ubiquitin ligase that regulates the level of  
605 cytoplasmic IFY-1/Securin and CYB-1/cyclin B1 in post-meiosis I embryos in *C. elegans* (Wang  
606 *et al.* 2013). In that study, RNA interference was used to reduce *etc-1* function [*etc-1(RNAi)*] and

607 CYB-1 degradation was monitored using a transgene that uses heterologous regulatory elements  
608 to drive the expression of a GFP::CYB-1 fusion protein in the *C. elegans* germline (*ekIs2[pie-*  
609 *Ip::gfp::cyb-1]*). We used a new viable and fertile allele of *cyb-1* that expresses a GFP-tagged  
610 CYB-1 fusion protein (Figure S1C; CYB-1::GFP<sub>F</sub>) to examine CYB-1::GFP expression in wild-  
611 type and in *etc-1(gk5182)* embryos (Figure 5, E and F). Since CYB-1 is essential for viability  
612 (van der Voet *et al.* 2009), the CYB-1::GFP fusion protein made by *cyb-1(tn1806[cyb-*  
613 *l::gfp::3xflag]*) homozygotes must be substantially functional *in vivo*. In otherwise wild-type  
614 animals, CYB-1::GFP is reduced in young mitotic embryos relative to meiotic embryos and  
615 oocytes (Figure 5E). However, in *etc-1(gk5182); cyb-1(tn1806)* embryos GFP levels continue to  
616 remain high after meiosis (Figure 5F). We also confirmed that *etc-1(gk5182)* affects the  
617 degradation of IFY-1::GFP (IFY-1::GFP<sub>F</sub>) using the fosmid-based transgene *ddlIs128[ify-*  
618 *l::gfp::3xflag]* (Sarov *et al.* 2012). *etc-1(gk5182)* appears to have a relatively weak effect on  
619 IFY-1::GFP (Figure 5, I and J) compared to PUF-3::GFP, PUF-11::GFP and CYB-1::GFP  
620 (Figure 5, A–F). The amount of GFP fluorescence in post-meiotic *etc-1(gk5182); ddlIs128*  
621 embryos is only slightly elevated relative to *etc-1(+)* control embryos (Figure 5, I and J).

622

### 623 ***ETC-1 is broadly expressed and present in oocytes and early embryos***

624 ETC-1 and its orthologs, Hul5 (yeast) and UBE3C (humans) have two well-defined structural  
625 domains: an IQ domain close to the N-terminus and a HECT domain at the extreme C-terminus  
626 (Figure 6A; Wang *et al.* 2013; Marín 2018). The HECT domain of UBE3C and other HECT-  
627 domain E3 ubiquitin ligases has a well-defined function; it is essential for mediating the  
628 acceptance and transfer of ubiquitin from an E2-conjugating enzyme to a degradation substrate

629 via a cysteine residue at its catalytic site (You and Pickart 2001; Singh and Sivaraman 2020;  
630 reviewed in Lorenz 2018). The IQ domain-containing N-terminus of UBE3C mediates an  
631 interaction with the proteasome that is also important for function, but this portion of UBE3C is  
632 less well-conserved than the HECT domain and its function is less well-defined (You and Pickart  
633 2001; You *et al.* 2003; Wang *et al.* 2013). Given this structural and functional information, we  
634 decided to tag the extreme N-terminus with GFP to examine where ETC-1 is expressed and  
635 localized in *C. elegans*.

636         When we examined the sequences at the 5' end of the *etc-1* gene (Figure 6A) it became  
637 apparent that ETC-1 translation might begin 60 bp upstream of the annotated start codon (ATG  
638 #2 in Figure 6A) (<http://www.wormbase.org>, release WS278). *etc-1* is the downstream gene in a  
639 two gene operon and contains an annotated and sequence-verified trans-splice acceptor site  
640 immediately adjacent to a possible start codon (ATG #1 in Figure 6A). In *C. elegans*, trans-  
641 splicing is used to physically separate the co-transcribed messenger RNAs of an operon (Spieth  
642 *et al.* 1993). We predicted that ETC-1 translation should be initiated at ATG #1 for the following  
643 reasons: (1) start codons are commonly found within 10 bp of a trans-splice acceptor site (Allen  
644 *et al.* 2011), and (2) after trans-splicing, ATG #1 would be the first start codon in the *etc-1*  
645 mRNA. If correct, 20 additional amino acids would be appended to the N-terminus of the  
646 predicted ETC-1 protein. Seven of these amino acids are similar or identical to equivalent  
647 residues at the N-terminus of UBE3C (Figure 6B). We created two different GFP-tagged alleles  
648 of *etc-1*: (1) *etc-1(tn1919[gfp::3xflag::etc-1#1])*, which places GFP (and another start codon)  
649 immediately upstream of the start codon adjacent to the trans-splice acceptor site (ATG #1), and  
650 (2) *etc-1(tn1920[gfp::3xflag::etc-1#2])*, which places an identical tag immediately upstream of  
651 the annotated start codon (ATG #2) (Figure S4A). Both *etc-1(tn1919)* and *etc-1(tn1920)* express

652 GFP (Figure 6, C and D, and Figure S4, B and C) and make large fusion proteins that  
653 approximate the predicted sizes of the GFP::ETC-1 fusion proteins (~150 kDa, see below)  
654 (Figure 6E). We conclude that a start codon immediately adjacent to the *etc-1* 5' trans-splice site  
655 is capable of initiating translation *in vivo*.

656 *etc-1(tn1919)* and *etc-1(tn1920)* express GFP::ETC-1 (labeled GFP<sub>F</sub>::ETC-1) in the  
657 oogenic germline of hermaphrodites, where it is both cytoplasmic and nucleoplasmic (Figure 6,  
658 C and D). We observed no significant difference in the amount of cytoplasmic GFP::ETC-1 in  
659 the germlines of *etc-1(tn1919)* (n=11) and *etc-1(tn1920)* (n=8) adult hermaphrodites ( $P>0.1$   
660 using a Student's *t*-test). In addition, both alleles express GFP::ETC-1 in embryos (Figure 6, C  
661 and D) and in a variety of somatic tissues, including the intestine, the spermatheca, and  
662 unidentified cells near the pharynx (arrow in Figure S4, B and C). Interestingly, *etc-1(tn1920)*  
663 adult hermaphrodites (n=3) express 2.4-fold more GFP::ETC-1 in the unidentified cells near the  
664 pharynx than *etc-1(tn1919)* adult hermaphrodites (n=7) ( $P<1\times 10^{-6}$  using a Student's *t*-test). This  
665 result suggests there could be differential start codon usage in some cell types. In *etc-1(tn1920)*  
666 animals, the start codon at the beginning of the GFP coding sequence is 60 bp downstream of  
667 ATG #1 and in the same relative position as the annotated start codon (ATG #2) in the  
668 endogenous *etc-1* gene (Figure S4A). We hypothesized that *etc-1(tn1920)* animals might be able  
669 to initiate GFP::ETC-1 translation both at the start codon used by *etc-1(tn1919)* animals (150.5  
670 kDa GFP::ETC-1) and at the start codon located at the beginning of the GFP coding sequence  
671 (148 kDa GFP::ETC-1). Consistent with this idea, some of the GFP::ETC-1 made by *etc-*  
672 *1(tn1920)* animals appears to migrate slightly faster on western blots (Figure 6E). These  
673 observations suggest that ETC-1 translation can initiate at ATG #1 in most tissues, including the  
674 germline, while leaving the possibility that ETC-1 translation also initiates at ATG #2 in some



675 somatic cells. However, it is also possible that the slightly different GFP expression patterns seen  
676 in *etc-1(tn1919)* and *etc-1(tn1920)* are caused by a difference in gene structure that we have not  
677 explicitly considered or the fact that these alleles are differently functional. As we will describe,  
678 *etc-1(tn1919)* (ATG #1) appears to be largely functional during the OET, while *etc-1(tn1920)*  
679 (ATG #2) resembles the strong loss-of-function *etc-1(gk5182)* allele.

680

681 ***ETC-1 may be non-essential, even when the function of the anaphase-promoting complex has***  
682 ***been compromised***

683 *etc-1(RNAi)* and *etc-1(tm5615)* deletion animals are viable and fertile; they do not have an overt  
684 phenotype in an otherwise wild-type background (Wang *et al.* 2013). *etc-1(gk5182)* animals are  
685 also viable and fertile with no overt defects in oocyte or embryo development. Whereas *etc-*  
686 *1(tm5615)* is predicted to be an in-frame deletion (Figure 6A), *etc-1(gk5182)* is a premature stop  
687 codon in the second exon of the *etc-1* gene (Figure 6A) and should be a strong loss-of-function  
688 allele. Because SEL-10 and ETC-1 both help degrade proteins during the first meiotic division,  
689 we tested whether the strong loss-of-function mutation *sel-10(ar41)* (Figure S1A) would provide  
690 a sensitized background to reveal defects. However, *etc-1(gk5182); lon-3(e2175)* and *etc-*  
691 *1(gk5182); lon-3(e2175) sel-10(ar41)* hermaphrodites are essentially indistinguishable and  
692 produce relatively large numbers of progeny ( $286 \pm 26$  larvae, n=14 parental animals, and  $283 \pm$   
693  $29$  larvae, n=15 parental animals, respectively, at 20 °C). These brood sizes are slightly reduced  
694 relative to the wild type but essentially indistinguishable from the brood sizes of *lon-3(e2175)*  
695 and *lon-3(e2175) sel-10(ar41)* hermaphrodites at 20 °C (Spike *et al.* 2018). Since Hul5, the  
696 ETC-1 ortholog of budding yeast, facilitates the degradation of protein aggregates that form

697 during heat stress (Fang *et al.* 2011), we examined whether *etc-1(gk5182)* animals are unusually  
698 sensitive to elevated temperatures. We failed to find any evidence that this is the case. *etc-*  
699 *1(gk5182)* animals are homozygous viable and fertile at 25 °C and can be maintained at this  
700 temperature for multiple generations. When wild-type animals are heat-stressed for 3 hours at 31  
701 °C, partially penetrant embryonic lethality occurs in the 24-hour period immediately after the  
702 stress is applied (Huelgas-Morales *et al.* 2016). Using this heat stress protocol, similar  
703 percentages of embryos produced within the relevant 24-hour period died when we compared  
704 animals with the *etc-1(gk5182)* genotype (21% lethality, n=565 embryos, n=12 animals) to the  
705 wild type (26%, n=463 embryos, n=11 animals). Wild-type L4-stage larvae shifted from 20 °C to  
706 37 °C for 1.5 hours exhibit partially penetrant larval arrest and lethality (Zevian and Yanowitz  
707 2014). Using this protocol, similar percentages of wild-type (54%, n=268) and *etc-1(gk5182)*  
708 mutant animals (48%, n=300) died after heat shock.

709 Wang *et al.* (2013) reported that *etc-1(RNAi)* strongly enhances the lethality of *mat-*  
710 *1(ax161ts); him-8(e1489)* animals at 15 °C. This enhancement was used to support the idea that  
711 ETC-1 and the anaphase promoting complex (APC) share redundant functions, including the  
712 degradation of the key cell cycle regulators IFY-1/securin and CYB-1/Cyclin B. We revisited  
713 this genetic interaction using *etc-1(gk5182)* and two different temperature-sensitive alleles that  
714 attenuate APC function in *C. elegans*: *emb-30(tn377ts)* and *mat-1(ax161ts)* (Furuta *et al.* 2000,  
715 Shakes *et al.* 2003). Contrary to expectation, we found that *etc-1(gk5182); emb-30(tn377ts)* and  
716 *mat-1(ax161ts); etc-1(gk5182)* double mutants are each homozygous viable and fertile at 15 °C.  
717 Since *mat-1(ax161ts)* was also used by Wang *et al.* (2013), we examined the number of larvae  
718 produced by *mat-1(ax161ts); etc-1(gk5182)* and *mat-1(ax161ts)* parents. These animals were  
719 initially derived from *mat-1*-balanced strains (Table S1). For each strain, we counted the number

720 of larvae produced by parents that were third-generation *mat-1(ax161ts)* homozygotes raised at  
721 15 °C. *mat-1(ax161ts); etc-1(gk5182)* animals produced fewer progeny ( $100 \pm 35$  larvae, n=15  
722 animals) than *mat-1(ax161ts)* animals ( $165 \pm 46$  larvae, n=17 animals) and this difference is  
723 statistically significant ( $P=0.0001$ ). However, the *mat-1(ax161ts); etc-1(gk5182)* double mutant  
724 phenotype is not as severe as the phenotype described for *mat-1(ax161ts); him-8(e1489); etc-*  
725 *1(RNAi)* animals at 15 °C (Wang *et al.* 2013) and is not comparable to the phenotype of *mat-*  
726 *1(ax161ts)* or *mat-1(ax161ts); him-8(e1489)* animals at 25 °C (Shakes *et al.* 2003).

727

### 728 ***GFP-fusion proteins are partially proteolyzed in etc-1(gk5182) animals***

729 The PUF-3::GFP, PUF-11::GFP, CYB-1::GFP and IFY-1::GFP fusion proteins each contain  
730 three FLAG epitope tags in addition to the fluorescent protein tag (Figure S1C, Sarov *et al.*  
731 2012). We used an antibody that recognizes the FLAG tag to examine each fusion protein by  
732 western blot in wild-type and *etc-1(gk5182)* hermaphrodites. Full-length PUF-3::GFP, PUF-  
733 11::GFP and CYB-1::GFP migrate as expected in lysates made from both wild-type and *etc-*  
734 *1(gk5182)* hermaphrodites (Figure 7A), while the IFY-1::GFP fusion protein migrates slightly  
735 slower than expected (Figure 7D). However, in each *etc-1(gk5182)* lysate, a second band is also  
736 recognized by the anti-FLAG antibody (Figure 7, A and D). This *etc-1(gk5182)*-specific band  
737 only accumulates when a GFP fusion protein is present (Figure S5A) and can be recognized by a  
738 GFP-specific antibody (Figure S5B). Depending on the GFP fusion protein, it migrates slightly  
739 faster (Figure 7A) or slower (Figure 7D) than a 40 kDa molecular weight marker. But in each  
740 case, the *etc-1(gk5182)*-specific band is predicted, based on size, to encompass the entire 31–32  
741 kDa GFP::FLAG tag (File S2). We estimate that these GFP::FLAG fragments account for 10–

742 20% of the total signal in each *etc-1(gk5182); puf-3(tn1820[puf-3::gfp::3xflag])* lane, 4–11% of  
743 the total signal in each *etc-1(gk5182); puf-11(tn1824[puf-11::gfp::3xflag])* lane and 4–10% of the  
744 total signal in each *etc-1(gk5182); cyb-1(tn1806[cyb-1::gfp::3xflag])* lane (Figure 7).  
745 GFP::FLAG fragments appear to be less abundant in *etc-1(gk5182); ddis128[ify-1::gfp::3xflag]*  
746 animals relative to the full length IFY-1::GFP fusion protein (Figure 7D), but we could not make  
747 an accurate assessment of this difference because the full-length fusion protein and fragment  
748 were not in the linear range of detection at the same time. These observations suggest that the  
749 GFP fluorescence observed in *etc-1(gk5182)* embryos (Figure 5, A–F and I–J) may derive from  
750 GFP::FLAG fragments rather than full-length PUF-3::GFP, PUF-11::GFP, CYB-1::GFP, or IFY-  
751 1::GFP fusion proteins.

752 Our observations of GFP fluorescence in living *etc-1(lf)* animals suggest that *etc-*  
753 *1(gk5182)* perturbs protein degradation during the OET (Figure 5). However, if the GFP::FLAG  
754 fragments generated from each fusion protein accumulate prior to this time (during oogenesis,  
755 for example), they might simply become easier to visualize when the full-length fusion protein is  
756 degraded during the OET. We examined whether GFP::FLAG fragments are generated from the  
757 PUF-3::GFP, PUF-11::GFP and CYB-1::GFP fusion proteins in unmated *etc-1(gk5182); fog-*  
758 *2(oz40)* females to address this possibility. Development of the oogenic germline is normal in  
759 *fog-2* mutant females, but due to the absence of the major sperm protein signal from sperm  
760 (McCarter *et al.* 1999; Miller *et al.* 2001), the rate of oocyte meiotic maturation is substantially  
761 decreased, and fertilization and embryo formation are prevented. We found that GFP::FLAG  
762 fragments are generated from each fusion protein in *etc-1(gk5182); fog-2* females (Figure 7B;  
763 see Figure S5D for a longer exposure). Relative to the amount of each full-length fusion protein,  
764 however, GFP::FLAG fragments appear to be considerably less abundant in unmated *etc-*

765 *l(gk5182); fog-2* females than in *etc-1(gk5182)* hermaphrodites (compare Figure 7, A and B) or  
766 mated *etc-1(gk5182); fog-2* females (compare Figure 7B and Figure S5, C and D). This was most  
767 noticeable for the GFP::FLAG fragments derived from CYB-1::GFP and PUF-11::GFP. These  
768 observations suggest that many of the GFP::FLAG fragments produced by *etc-1(gk5182)* mutant  
769 hermaphrodites and mated females are generated when each GFP fusion protein is degraded  
770 during the OET.

771 GFP::FLAG fragments also accumulate in *etc-1(gk5182); cyb-1(tn1806); fog-2(oz40)*  
772 adult males (Figure 7B). Endogenous CYB-1 is abundant in the male germline and eliminated  
773 toward the end of meiosis (Yoon *et al.* 2017). CYB-1::GFP exhibits a similar pattern of  
774 accumulation in *fog-2* males (Figure S6, A and B). In *etc-1(gk5182); fog-2* males, however, a  
775 GFP signal perdures past the stage where CYB-1::GFP is normally eliminated (Figure S6, C and  
776 D). Much of this signal localizes to residual bodies (Figure S6, E and F). Residual bodies form at  
777 the end of the second meiotic division and receive cellular materials that are not required during  
778 subsequent stages of spermatogenesis (Ward *et al.* 1981; reviewed in Chu and Shakes 2013). It  
779 seems likely that, as in *etc-1(gk5182)* embryos, the GFP fluorescence seen in *etc-1(gk5182)*  
780 residual bodies derives from GFP::FLAG fragments that are formed when CYB-1::GFP is  
781 degraded during meiosis.

782

### 783 ***ETC-1 may promote proteasome processivity***

784 Hul5 and UBE3C, the yeast and human orthologs of ETC-1, are proteasome-associated ubiquitin  
785 ligases that help the proteasome degrade difficult substrates (Crosas *et al.* 2006; Fang *et al.* 2011;  
786 Kuo and Goldberg 2017; Gottlieb *et al.* 2019). In this context, Hul5 and UBE3C are thought to

787 be important for the processive degradation of proteins that are stalled on the proteasome. This  
788 hypothesis was based, in part, on experiments with GFP fusion proteins. In the absence of Hul5,  
789 or after UBE3C knockdown, the proteasomal degradation of substrates consisting of an unstable  
790 domain fused with the much more stable GFP domain is incomplete. This results in the  
791 accumulation of stable GFP-containing fragments of the original fusion protein (Aviram and  
792 Kornitzer 2010; Martinez-Noël *et al.* 2012; Chu *et al.* 2013). The experiments described in the  
793 previous section strongly suggest that ETC-1 plays a similar role in *C. elegans*. We added to  
794 these observations by examining additional GFP and non-GFP-tagged fusion proteins in *etc-1(lf)*  
795 hermaphrodites, as described below.

796 **GFP::*ETC-1* fusion proteins:** Neither GFP::*ETC-1* fusion protein is partially processed to a  
797 substantial extent (Figure 6E). To determine whether either GFP-tagged allele is functional *in*  
798 *vivo*, we examined whether PUF-3::GFP is partially processed in *etc-1(tn1919)* and *etc-*  
799 *1(tn1920)* hermaphrodites. GFP::FLAG fragments accumulate in PUF-3::GFP-expressing *etc-*  
800 *1(tn1920)* animals and are similar in abundance to the GFP::FLAG fragments seen in *etc-*  
801 *1(gk5182)* animals (Figure 6E). *etc-1(tn1920)* therefore appears to be a strong loss-of-function  
802 mutation. Only a very small amount of the PUF-3::GFP-derived GFP::FLAG fragment  
803 accumulates in *etc-1(tn1919)* animals (Figure 6E, see the longer exposure), suggesting that *etc-*  
804 *1(tn1919)* retains a significant amount of function in the *C. elegans* germline. It is not clear why  
805 GFP::*ETC-1*-derived GFP::FLAG fragments do not substantially accumulate in *etc-1(tn1920)*  
806 animals. Possibly *ETC-1* itself is not a substrate for proteasomal degradation. Alternatively, it is  
807 possible that these fragments accumulate to a level that is below our detection threshold. In this  
808 regard, it is worth noting that GFP::*ETC-1* is expressed at much lower levels than PUF-3::GFP  
809 (Figure 6E).

810 **RNP-8::GFP fusion proteins:** We created a GFP-tagged allele of *rnp-8* (Figure S1C; RNP-  
811 8::GFP<sub>F</sub> in all figures) and found that RNP-8::GFP is abundantly expressed in oocytes and early  
812 embryos (Figure S7A). We do not know whether this GFP-tagged allele of *rnp-8* (*rnp-*  
813 *8(tn1860[rnp-8::gfp:3xflag])*) is functional *in vivo*. Although RNP-8 is thought to be degraded in  
814 response to oocyte maturation (Kim *et al.* 2010), RNP-8::GFP is not strongly down-regulated  
815 during the oocyte-to-embryo transition (Figure S7A). GFP fluorescence is not obviously  
816 increased in *rnp-8(tn1860); etc-1(gk5182)* animals compared to *etc-1(+)* control animals (Figure  
817 S7, A and B). Nevertheless, a small proportion of the RNP-8::GFP fusion protein made by *rnp-*  
818 *8(tn1860)* is partially processed into GFP::FLAG fragments in *etc-1(gk5182)* hermaphrodites  
819 (Figure S5C).

820 **LIN-41 fusion proteins:** Only full-length mSCARLET::LIN-41 fusion proteins accumulate to a  
821 substantial level in wild-type, *etc-1(gk5182)* and *sel-10(lf)* hermaphrodites (Figure 7C). We did  
822 not detect mSCARLET::FLAG or DENDRA::FLAG fragments at elevated levels in *etc-*  
823 *1(gk5182)*, *sel-10(ar41)* or *sel-10(ok1632)* animals (Figure 7C; Figure S5E). This is consistent  
824 with the observation that the levels of fluorescence appear to be the same in embryos made by  
825 wild-type and *etc-1(gk5182)* animals that express mSCARLET::LIN-41 (Figure 5, G and H) and  
826 the conclusion that the *etc-1(gk5182)* mutation does not perturb the SEL-10-mediated  
827 degradation of mSCARLET::LIN-41 or DENDRA::LIN-41 that we documented using  
828 fluorescence microscopy (Figure 1, A and B; Figure 2). We tested whether GFP::LIN-41 would  
829 behave in the same way by crossing our original GFP-tagged *lin-41(tn1541)* allele (Figure S1B;  
830 GFP<sub>S</sub>::LIN-41 below and in all figures) into an *etc-1(gk5182)* genetic background. However, we  
831 found that GFP is not appropriately down-regulated in the embryos of *lin-41(tn1541); etc-*  
832 *1(gk5182)* hermaphrodites compared to *lin-41(tn1541); etc-1(+)* controls (Figure S7, C and D).

833 These observations suggest that GFP<sub>S</sub>::LIN-41 is partially processed in *etc-1(gk5182)*  
834 hermaphrodites and imply that GFP-tagged fusion proteins might be more recalcitrant than other  
835 fusion proteins to processivity-challenged proteasomes.

836 To rigorously investigate these possibilities, we created new *lin-41* alleles that express a  
837 GFP::FLAG-tagged LIN-41 fusion protein (GFP<sub>F</sub>::LIN-41). We isolated two independent  
838 insertions that were given different allele names [*lin-41(tn2054[gfp::3xflag::lin-41])* and *lin-*  
839 *41(tn2055[gfp::3xflag::lin-41])*], see Figure S1B]; these two alleles are molecularly identical and  
840 were used interchangeably in our experiments. Interestingly, GFP fluorescence in GFP<sub>F</sub>::LIN-41-  
841 expressing worms is much brighter than in GFP<sub>S</sub>::LIN-41-expressing worms (compare Figures  
842 S7, E and G), possibly because the mRNA sequence that encodes the GFP::3xFLAG tag has a  
843 much higher codon adaptation index (CAI=0.92) than the sequence that encodes the GFP::S tag  
844 (CAI=0.28) (Redemann *et al.* 2011). More than half of the GFP<sub>F</sub>::LIN-41-expressing animals  
845 also exhibit a defect in egg laying (Egl phenotype) as adult hermaphrodites at 20°C (Figure  
846 S7H). A similar phenotype is observed when LIN-41 is over-expressed in somatic cells during  
847 the fourth larval (L4) stage by interfering with *let-7* microRNA regulation (e.g., using the *lin-*  
848 *41(xe11gf)* allele described by Ecsedi *et al.* 2015). With respect to our tagged alleles of *lin-41*,  
849 however, this defect uniquely characterizes the GFP::FLAG tagged alleles, as most GFP<sub>S</sub>::LIN-  
850 41 (Figure S7F), mSCARLET::LIN-41, and DENDRA::LIN-41-expressing adults do not have an  
851 Egl phenotype. Despite these intriguing differences, the temporal expression pattern and  
852 regulation of GFP<sub>F</sub>::LIN-41 strongly resembles GFP<sub>S</sub>::LIN-41. Most importantly, GFP<sub>F</sub>::LIN-41-  
853 expressing animals exhibit higher levels of GFP fluorescence in the early embryos made by *sel-*  
854 *10(ok1632)* and *etc-1(gk5182)* mutants relative to otherwise wild-type hermaphrodites (Figure 5,  
855 K and L; Figure S7, I–N). Interestingly, the subcellular localization pattern of GFP<sub>F</sub>::LIN-41-



856 derived GFP fluorescence is distinctly different in the early embryos made by *sel-10(ok1632)*  
857 and *etc-1(gk5182)* mutant hermaphrodites (Figure S7, K and M). In *sel-10(ok1632)* embryos,  
858 GFP fluorescence is primarily cytoplasmic and appears to be enriched in ribonucleoprotein  
859 particles called P granules (Figure S7M). Localization to embryonic P granules is also observed  
860 when LIN-41 degron sequences are disrupted in GFP<sub>S</sub>::LIN-41 (Spike *et al.* 2018). In *etc-*  
861 *1(gk5182)* embryos, however, GFP fluorescence does not localize to P granules and is slightly  
862 enriched in the nucleus (Figure S7K). These observations are consistent with the idea that  
863 GFP<sub>F</sub>::LIN-41 is partially processed into a GFP-containing protein fragment that is largely  
864 responsible for the excess fluorescence observed in early *etc-1(gk5182)* embryos.

865         The only difference between GFP<sub>F</sub>::LIN-41, mSCARLET::LIN-41 and DENDRA::LIN-  
866 41 is the fluorescent protein fused to LIN-41 (Figure S1B). We examined all of these proteins in  
867 *etc-1(gk5182)* and *etc-1(+)* hermaphrodites by western blot, and confirmed that GFP::FLAG  
868 fragments accumulate in GFP<sub>F</sub>::LIN-41-expressing *etc-1(gk5182)* adults at elevated levels  
869 relative to *etc-1(+)* animals (Figure 7E). A longer exposure of the same western blot revealed  
870 low levels of GFP::FLAG fragments even in *etc-1(+)* hermaphrodites (Figure S5F). However,  
871 *etc-1*-dependent fragments derived from the mSCARLET::LIN-41 and DENDRA::LIN-41  
872 fusion proteins were not observed. We conclude that *etc-1(gk5182)* specifically disrupts the  
873 proteolysis of the GFP-containing LIN-41 fusion proteins (GFP<sub>F</sub>::LIN-41 and GFP<sub>S</sub>::LIN-41)  
874 and speculate that tagging LIN-41 with GFP creates a LIN-41 fusion protein that is more  
875 difficult to degrade. Consistent with this idea, GFP is known to be a particularly stable  
876 fluorescent protein that can be difficult for the proteasome to degrade (Khmelniskii *et al.* 2016;  
877 Reichard *et al.* 2016; Bragança and Kraut 2020). Based on these observations, we propose that  
878 fusion with GFP is an important cause of the proteolysis defects observed in *etc-1(gk5182)*

879 animals (Figures 5 and 7). In this context, we note the study that identified and described ETC-1  
880 as a target-specific E3 ubiquitin ligase in *C. elegans* (Wang *et al.* 2013) relied on GFP fusion  
881 proteins and monitored protein degradation by looking exclusively at fluorescence. Our  
882 observations suggest, instead, that the *C. elegans etc-1* gene has the same type of activity  
883 described for orthologous genes in yeast and humans (Aviram and Kornitzer 2010; Martinez-  
884 Noël *et al.* 2012; Chu *et al.* 2013) and that the ETC-1 protein promotes proteasome processivity,  
885 which may be especially important during the OET when many proteins are targeted for efficient  
886 proteasomal degradation.

#### 887 ***ETC-1/Hul5/UBE3C, GFP fusion proteins, and proteasome processivity***

888 Wang *et al.* (2013) identified and described ETC-1 (UBE Three C), the *C. elegans* UBE3C  
889 ortholog, as a HECT-type E3 ubiquitin ligase that promotes the degradation of the essential cell  
890 cycle proteins IFY-1/Securin and CYB-1/Cyclin B1 during the OET. Degradation was monitored  
891 using a GFP fusion protein (IFY-1::GFP or GFP::CYB-1), immunoprecipitation assays clearly  
892 documented a specific interaction between the GFP fusion protein and ETC-1, and *in vitro*  
893 assays confirmed that ETC-1 is able to interact with, and ubiquitylate, each target protein.  
894 Although these findings were consistent with the interpretation that ETC-1 functions as an E3  
895 ubiquitin ligase, they are also compatible with our results that suggest instead that ETC-1  
896 functions as an E4 enzyme that mediates ubiquitin chain elongation for the processive  
897 degradation of proteins already targeted for ubiquitin conjugation by E3 enzymes—a function  
898 shown for Hul5 in budding yeast (Crosas *et al.* 2006). Thus, the observations of Wang *et al.*  
899 (2013) at the time supported a simple and sensible model: that ETC-1 and the anaphase  
900 promoting complex target the same *C. elegans* proteins (e.g., IFY-1 and CYB-1) for  
901 ubiquitination and degradation. This model was also supported by the observation that *etc-*

902 *I(RNAi)* strongly enhances the phenotype of mutants with a compromised APC. As described in  
903 a previous section, we revisited the latter idea using *etc-1(gk5182)*; although there was evidence  
904 of a genetic interaction between *etc-1(gk5182)* and *mat-1(ax161ts)* that might indicate a role for  
905 ETC-1 in protein degradation during the OET, we did not observe a strongly enhanced  
906 phenotype.

### 907 ***Caveats for analyzing the in vivo dynamics of protein degradation using GFP-fusion proteins***

908 Our analyses of several different GFP fusion proteins, including GFP fusions with IFY-1 and  
909 CYB-1, provide a significantly more complicated explanation for the apparent perdurance of  
910 each protein in the absence of ETC-1. It appears that the addition of a GFP moiety to several  
911 proteins that are rapidly degraded during the OET, such as IFY-1, CYB-1, PUF-3, PUF-11, or  
912 LIN-41, creates fusion proteins that are incompletely degraded in the absence of *etc-1* function.  
913 Incomplete degradation results in the accumulation of a partial GFP-containing fragment in  
914 embryos that is easily confused for the full-length GFP fusion protein when only fluorescence is  
915 examined. Evidence that the GFP moiety is a determining factor is derived from our analysis of  
916 LIN-41 fusion proteins. LIN-41 fusion proteins containing one of three different fluorescent  
917 proteins, mSCARLET, DENDRA or GFP, were examined and the only fusion protein that was  
918 incompletely degraded in an ETC-1-dependent manner was GFP::LIN-41 (Figure 7E). Our  
919 experiments do not demonstrate, however, that the fused portion of the *C. elegans* protein is not  
920 important for determining whether substrate processivity is substantively reduced in the absence  
921 of ETC-1. Indeed, the GFP::ETC-1 fusion protein made by the loss-of-function *etc-1(tn1920)*  
922 may not be partially processed (Figure 6E). Although it is tempting to speculate that this is  
923 because GFP::ETC-1 is not obviously unstable during the OET (Figure 6D), our experiments  
924 with RNP-8::GFP (Figure S5C and S7B) and unmated females (Figure 7B) argue for a more

925 nuanced view. In the unmated females, for example, it seems likely the proteasome still helps to  
926 degrade or “turn over” each GFP fusion protein, but the proteins are relatively stable and many  
927 fewer fragments are formed in the absence of *etc-1* function. In fact, it would be surprising if the  
928 *C. elegans* protein fused to GFP is of no importance whatsoever; sequences outside the GFP  
929 moiety are important for the Hul5-dependent proteolytic processing of a GFP-Pcl5 fusion protein  
930 in *S. cerevisiae* (Aviram and Kornitzer 2010), and it is becoming increasingly clear that the  
931 method and type of substrate ubiquitination influences proteasome processivity (Reichard *et al.*  
932 2016; Bragança and Kraut 2020). Taken together, we believe our experiments with ETC-1  
933 update the literature to show that ETC-1 plays a conserved role to promote proteasome  
934 processivity and provide a cautionary note on the need to analyze endogenous proteins where  
935 possible, utilize multiple protein tags and, ideally, analyze proteins on western blots when  
936 studying protein degradation *in vivo*. Fortunately, the ease and rapidity of genome editing  
937 continues to revolutionize the ability to conduct such experiments in the *C. elegans* system  
938 (reviewed by Nance and Frøkjaer-Jensen 2019).

939

## ACKNOWLEDGMENTS

940 We are grateful to Bob Goldstein, Judith Kimble, Geraldine Seydoux, and Marcus Vargas for  
941 providing strains or reagents. Some strains were provided by the Caenorhabditis Genetics Center,  
942 which is funded by grant P40OD010440 from the NIH Office of Research Infrastructure  
943 Programs. We also thank WormBase for sequences and annotations. Gabriela Huelgas-Morales  
944 and Todd Starich provided helpful suggestions during the course of this work. This work was  
945 supported by NIH grant GM57173 (to D.G.).

946

947

## LITERATURE CITED

- 948 Allen, A. K., J. E. Nesmith, and A. Golden, 2014 An RNAi-based suppressor screen identifies  
949 interactors of the Myt1 ortholog of *Caenorhabditis elegans*. *G3 (Bethesda)* 4: 2329–  
950 2343.
- 951 Allen, M. A., L. W. Hillier, R. H. Waterston, and T. Blumenthal, 2011 A global analysis of *C.*  
952 *elegans* trans-splicing. *Genome Res* 21: 255–264.
- 953 Arribere, J. A., R. T. Bell, B. X. Fu, K. L. Artiles, P. S. Hartman *et al.*, 2014 Efficient marker-  
954 free recovery of custom genetic modifications with CRISPR/Cas9 in *Caenorhabditis*  
955 *elegans*. *Genetics* 198: 837–846.
- 956 Aviram, S., and D. Kornitzer, 2010 The ubiquitin ligase Hul5 promotes proteasomal  
957 processivity. *Mol Cell Biol* 30: 985–994.
- 958 Bachvarova, R., E. H. Davidson, V. G. Allfrey, and A. E. Mirsky, 1966 Activation of RNA  
959 synthesis associated with gastrulation. *Proc Natl Acad Sci U S A* 55: 358–365.
- 960 Blitz, I. L., and K. W. Y. Cho, 2021 Control of zygotic genome activation in *Xenopus*. *Curr Top*  
961 *Dev Biol* 145: 167–204.
- 962 Boxem, M., D. G. Srinivasan, and S. van den Heuvel, 1999 The *Caenorhabditis elegans* gene  
963 *ncc-1* encodes a cdc2-related kinase required for M phase in meiotic and mitotic cell  
964 divisions, but not for S phase. *Development* 126: 2227–2239.
- 965 Bragança, C. E., and D. A. Kraut, 2020 Mode of targeting to the proteasome determines GFP  
966 fate. *J Biol Chem* 295: 15892–15901.
- 967 Burrows, A. E., B. K. Scurman, M. E. Kosinski, C. T. Richie, P. L. Sadler *et al.*, 2006 The *C.*  
968 *elegans* Myt1 ortholog is required for the proper timing of oocyte maturation.  
969 *Development* 133: 697–709.

- 970 Cao, W. X., A. Karaiskakis, S. Lin, S. Angers, and H. D. Lipshitz, 2021 The F-box protein Bard  
971 (CG14317) targets the Smaug RNA-binding protein for destruction during the  
972 *Drosophila* maternal-to-zygotic transition. Genetics in press.
- 973 Cao, W. X., S. Kabelitz, M. Gupta, E. Yeung, S. Lin *et al.*, 2020 Precise temporal regulation of  
974 post-transcriptional repressors is required for an orderly *Drosophila* maternal-to-zygotic  
975 transition. Cell Rep 31: 107783.
- 976 Chang, H. M., N. J. Martinez, J. E. Thornton, J. P. Hagan, K. D. Nguyen *et al.*, 2012 Trim71  
977 cooperates with microRNAs to repress Cdkn1a expression and promote embryonic stem  
978 cell proliferation. Nat Commun 3: 923.
- 979 Chen, J., F. Lai, and L. Niswander, 2012 The ubiquitin ligase mLin41 temporally promotes  
980 neural progenitor cell maintenance through FGF signaling. Genes Dev 26: 803–815.
- 981 Choi, W. J., M. W. Clark, J. X. Chen, and A. Y. Jong, 1990 The CDC4 gene product is  
982 associated with the yeast nuclear skeleton. Biochem Biophys Res Commun 172: 1324–  
983 1330.
- 984 Chu, B. W., K. M. Kovary, J. Guillaume, L. C. Chen, M. N. Teruel *et al.*, 2013 The E3 ubiquitin  
985 ligase UBE3C enhances proteasome processivity by ubiquitinating partially proteolyzed  
986 substrates. J Biol Chem 288: 34575–34587.
- 987 Chu, D. S., and D. C. Shakes, 2013 Spermatogenesis. Adv Exp Med Biol 757: 171–203.
- 988 Chudakov, D. M., S. Lukyanov, and K. A. Lukyanov, 2007 Using photoactivatable fluorescent  
989 protein Dendra2 to track protein movement. Biotechniques 42: 553–563.
- 990 Clegg, K. B., and L. Pikó, 1982 RNA synthesis and cytoplasmic polyadenylation in the one-cell  
991 mouse embryo. Nature 295: 343–344.
- 992 Collins, G. A., and A. L. Goldberg, 2017 The logic of the 26S proteasome. Cell 169: 792–806.

- 993 Crosas, B., J. Hanna, D. S. Kirkpatrick, D. P. Zhang, Y. Tone *et al.*, 2006 Ubiquitin chains are  
994 remodeled at the proteasome by opposing ubiquitin ligase and deubiquitinating activities.  
995 Cell 127: 1401–1413.
- 996 Cuevas, E., A. Rybak-Wolf, A. M. Rohde, D. T. Nguyen, and F. G. Wulczyn, 2015  
997 Lin41/Trim71 is essential for mouse development and specifically expressed in postnatal  
998 ependymal cells of the brain. Front Cell Dev Biol 3: 20.
- 999 de la Cova, C. and I. Greenwald, 2012 SEL-10/Fbw7-dependent negative feedback regulation of  
1000 LIN-45/Braf signaling in *C. elegans* via a conserved phosphodegron. Genes Dev 26:  
1001 2524–2535.
- 1002 Dejima, K., S. Hori, S. Iwata, Y. Suehiro, S. Yoshina *et al.*, 2018 An aneuploidy-free and  
1003 structurally defined balancer chromosome toolkit for *Caenorhabditis elegans*. Cell Rep  
1004 22: 232–241.
- 1005 Deshaies, R. J., and J. E. Ferrell, 2001 Multisite phosphorylation and the countdown to S phase.  
1006 Cell 107: 819–822.
- 1007 Dickinson, D. J., A. M. Pani, J. K. Heppert, C. D. Higgins, and B. Goldstein, 2015 Streamlined  
1008 genome engineering with a self-excising drug selection cassette. Genetics 200: 1035–  
1009 1049.
- 1010 Dikic, I., 2017 Proteasomal and autophagic degradation systems. Annu Rev Biochem 86: 193–  
1011 224.
- 1012 Ding, M., D. Chao, G. Wang, and K. Shen, 2007 Spatial regulation of an E3 ubiquitin ligase  
1013 directs selective synapse elimination. Science 317: 947–951.
- 1014 Dorfman, M., J. E. Gomes, S. O'Rourke, and B. Bowerman, 2009 Using RNA interference to  
1015 identify specific modifiers of a temperature-sensitive, embryonic-lethal mutation in the



- 1016 *Caenorhabditis elegans* ubiquitin-like Nedd8 protein modification pathway E1-activating  
1017 gene *rfl-1*. *Genetics* 182: 1035–1049.
- 1018 Ecsedi, M., M. Rausch, and H. Großhans, 2015 The *let-7* microRNA directs vulval development  
1019 through a single target. *Dev Cell* 32: 335–344.
- 1020 Edgar, L. G., N. Wolf, and W. B. Wood, 1994 Early transcription in *Caenorhabditis elegans*  
1021 embryos. *Development* 120: 443–451.
- 1022 Fang, N. N., A. H. Ng, V. Measday, and T. Mayor, 2011 Hul5 HECT ubiquitin ligase plays a  
1023 major role in the ubiquitylation and turnover of cytosolic misfolded proteins. *Nat Cell*  
1024 *Biol* 13: 1344–1352.
- 1025 Finley, D., 2009 Recognition and processing of ubiquitin-protein conjugates by the proteasome.  
1026 *Annu Rev Biochem* 78: 477–513.
- 1027 Furey, C. G., J. Choi, S. C. Jin, X. Zeng, A. T. Timberlake *et al.*, 2018 De Novo mutation in  
1028 genes regulating neural stem cell fate in human congenital hydrocephalus. *Neuron* 99:  
1029 302–314.
- 1030 Furuta, T., S. Tuck, J. Kirchner, B. Koch, R. Auty *et al.*, 2000 EMB-30: an APC4 homologue  
1031 required for metaphase-to-anaphase transitions during meiosis and mitosis in  
1032 *Caenorhabditis elegans*. *Mol Biol Cell* 11: 1401–1419.
- 1033 Gallo, C. M., J. T. Wang, F. Motegi, and G. Seydoux, 2010 Cytoplasmic partitioning of P  
1034 granule components is not required to specify the germline in *C. elegans*. *Science* 330:  
1035 1685–1689.
- 1036 Gottlieb, C. D., A. C. S. Thompson, A. Ordureau, J. W. Harper, and R. R. Kopito, 2019 Acute  
1037 unfolding of a single protein immediately stimulates recruitment of ubiquitin protein  
1038 ligase E3C (UBE3C) to 26S proteasomes. *J Biol Chem* 294: 16511–16524.

- 1039 Govindan, J. A., H. Cheng, J. E. Harris, and D. Greenstein, 2006  $G\alpha_{o/i}$  and  $G\alpha_s$  signaling  
1040 function in parallel with the MSP/Eph receptor to control meiotic diapause in *C. elegans*.  
1041 *Curr Biol* 16: 1257–1268.
- 1042 Green, R. A., A. Audhya, A. Pozniakovsky, A. Dammermann, H. Pemble *et al.*, 2008 Expression  
1043 and imaging of fluorescent proteins in the *C. elegans* gonad and early embryo. *Methods*  
1044 *Cell Biol* 85: 179–218.
- 1045 Griffin, E. E., D. J. Odde, and G. Seydoux, 2011 Regulation of the MEX-5 gradient by a  
1046 spatially segregated kinase/phosphatase cycle. *Cell* 146: 955–968.
- 1047 Gurskaya, N. G., V. V. Verkhusha, A. S. Shcheglov, D. B. Staroverov, T. V. Chepurnykh *et al.*,  
1048 2006 Engineering of a monomeric green-to-red photoactivatable fluorescent protein  
1049 induced by blue light. *Nat Biotechnol* 24: 461–465.
- 1050 Hamatani, T., M. G. Carter, A. A. Sharov, and M. S. Ko, 2004 Dynamics of global gene  
1051 expression changes during mouse preimplantation development. *Dev Cell* 6: 117–131.
- 1052 Harris, T. W., J. Baran, T. Bieri, A. Cabunoc, J. Chan *et al.*, 2014 WormBase 2014: new views  
1053 of curated biology. *Nucleic Acids Res.* 42: D789–D793.
- 1054 Harrison, M. M., and M. B. Eisen, 2015 Transcriptional activation of the zygotic genome in  
1055 *Drosophila*. *Curr Top Dev Biol* 113: 85–112.
- 1056 Haupt, K. A., K. T. Law, A. L. Enright, C. R. Kanzler, H. Shin *et al.*, 2020 A PUF hub drives  
1057 self-renewal in *Caenorhabditis elegans* germline stem cells. *Genetics* 214: 147–161.
- 1058 Herrera, R. A., K. Kiontke, and D. H. Fitch, 2016 Makorin ortholog LEP-2 regulates LIN-28  
1059 stability to promote the juvenile-to-adult transition in *Caenorhabditis elegans*.  
1060 *Development* 143: 799–809.
- 1061 Hubbard, E. J., G. Wu, J. Kitajewski, and I. Greenwald, 1997 *sel-10*, a negative regulator of *lin-*

- 1062 *l2* activity in *Caenorhabditis elegans*, encodes a member of the CDC4 family of  
1063 proteins. *Genes Dev* 11: 3182–3193.
- 1064 Hubstenberger, A., C. Cameron, R. Shtofman, S. Gutman, and T. C. Evans, 2012 A network of  
1065 PUF proteins and Ras signaling promote mRNA repression and oogenesis in *C. elegans*.  
1066 *Dev Biol* 366: 218–231.
- 1067 Huelgas-Morales, G., and D. Greenstein, 2018 Control of oocyte meiotic maturation in *C.*  
1068 *elegans*. *Semin Cell Dev Biol* 84: 90–99.
- 1069 Huelgas-Morales, G., C. G. Silva-García, L. S. Salinas, D. Greenstein, and R. E. Navarro, 2016  
1070 The stress granule RNA-binding protein TIAR-1 protects female germ cells from heat  
1071 shock in *Caenorhabditis elegans*. *G3 (Bethesda)* 6: 1031–1047.
- 1072 Jan, E., C. K. Motzny, L. E. Graves, and E. B. Goodwin, 1999 The STAR protein, GLD-1, is a  
1073 translational regulator of sexual identity in *Caenorhabditis elegans*. *EMBO J* 18: 258–  
1074 269.
- 1075 Jin, S. C., W. Dong, A. J. Kundishora, S. Panchagnula, A. Moreno-De-Luca *et al.*, 2020 Exome  
1076 sequencing implicates genetic disruption of prenatal neuro-gliogenesis in sporadic  
1077 congenital hydrocephalus. *Nat Med* 26: 1754–1765.
- 1078 Kanamoto, T., K. Terada, H. Yoshikawa, and T. Furukawa, 2006 Cloning and regulation of the  
1079 vertebrate homologue of *lin-41* that functions as a heterochronic gene in *Caenorhabditis*  
1080 *elegans*. *Dev Dyn* 235: 1142–1149.
- 1081 Kelly, W. G., S. Xu, M. K. Montgomery, and A. Fire, 1997 Distinct requirements for somatic  
1082 and germline expression of a generally expressed *Caenorhabditis elegans* gene.  
1083 *Genetics* 146: 227–238.
- 1084 Khmelinskii, A., M. Meurer, C. T. Ho, B. Besenbeck, J. Füller *et al.*, 2016 Incomplete

- 1085 proteasomal degradation of green fluorescent proteins in the context of tandem  
1086 fluorescent protein timers. *Mol Biol Cell* 27: 360–370.
- 1087 Kim, K. W., T. L. Wilson, and J. Kimble, 2010 GLD-2/RNP-8 cytoplasmic poly(A) polymerase  
1088 is a broad-spectrum regulator of the oogenesis program. *Proc Natl Acad Sci U S A* 107:  
1089 17445–17450.
- 1090 Kipreos, E. T., 2005 Ubiquitin-mediated pathways in *C. elegans*. *WormBook*: 1–24.
- 1091 Kisielnicka, E., R. Minasaki, and C. R. Eckmann, 2018 MAPK signaling couples SCF-mediated  
1092 degradation of translational regulators to oocyte meiotic progression. *Proc Natl Acad Sci*  
1093 *U S A* 115: E2772–E2781.
- 1094 Kitagawa, R., E. Law, L. Tang, and A. M. Rose, 2002 The Cdc20 homolog, FZY-1, and its  
1095 interacting protein, IFY-1, are required for proper chromosome segregation in  
1096 *Caenorhabditis elegans*. *Curr Biol* 12: 2118–2123.
- 1097 Kloosterman, W. P., E. Wienholds, R. F. Ketting, and R. H. Plasterk, 2004 Substrate  
1098 requirements for *let-7* function in the developing zebrafish embryo. *Nucleic Acids Res*  
1099 32: 6284–6291.
- 1100 Kotani, T., K. Maehata, and N. Takei, 2017 Regulation of translationally repressed mRNAs in  
1101 zebrafish and mouse oocytes. *Results Probl Cell Differ* 63: 297–324.
- 1102 Kuo, C. L., and A. L. Goldberg, 2017 Ubiquitinated proteins promote the association of  
1103 proteasomes with the deubiquitinating enzyme Usp14 and the ubiquitin ligase Ube3c.  
1104 *Proc Natl Acad Sci U S A* 114: E3404–E3413.
- 1105 Lambert, T. J., 2019 FPbase: a community-editable fluorescent protein database. *Nat Methods*  
1106 16: 277–278.
- 1107 Latham, K. E., J. I. Garrels, C. Chang, and D. Solter, 1991 Quantitative analysis of protein

- 1108 synthesis in mouse embryos. I. Extensive reprogramming at the one- and two-cell stages.  
1109 Development 112: 921–932.
- 1110 Lau, N. C., L. P. Lim, E. G. Weinstein, and D. P. Bartel, 2001 An abundant class of tiny RNAs  
1111 with probable regulatory roles in *Caenorhabditis elegans*. Science 294: 858–862.
- 1112 Lin, Y. C., L. C. Hsieh, M. W. Kuo, J. Yu, H. H. Kuo *et al.*, 2007 Human TRIM71 and its  
1113 nematode homologue are targets of *let-7* microRNA and its zebrafish orthologue is  
1114 essential for development. Mol Biol Evol 24: 2525–2534.
- 1115 Liu, J., S. Vasudevan, and E. T. Kipreos, 2004 CUL-2 and ZYG-11 promote meiotic anaphase II  
1116 and the proper placement of the anterior-posterior axis in *C. elegans*. Development 131:  
1117 3513–3525.
- 1118 Liu, Q., X. Chen, M. K. Novak, S. Zhang, and W. Hu, 2021 Repressing Ago2 mRNA translation  
1119 by Trim71 maintains pluripotency through inhibiting *let-7* microRNAs. Elife 10: e66288.
- 1120 Lorenz, S., 2018 Structural mechanisms of HECT-type ubiquitin ligases. Biol Chem 399: 127–  
1121 145.
- 1122 Luong, X. G., and M. Conti, 2019 RNA binding protein networks and translational regulation in  
1123 oocytes. In *Human Reproductive and Prenatal Genetics*, edited by P. C. K. Leung and J.  
1124 Qiao. Academic Press, Cambridge.
- 1125 Maller Schulman, B. R., X. Liang, C. Stahlhut, C. DelConte, G. Stefani *et al.*, 2008 The *let-7*  
1126 microRNA target gene, *Mlin41/Trim71* is required for mouse embryonic survival and  
1127 neural tube closure. Cell Cycle 7: 3935–3942.
- 1128 Martínez-Noël, G., J. T. Galligan, M. E. Sowa, V. Arndt, T. M. Overton *et al.*, 2012  
1129 Identification and proteomic analysis of distinct UBE3A/E6AP protein complexes. Mol  
1130 Cell Biol 32: 3095–3106.

- 1131 Marín, I., 2018 Origin and evolution of fungal HECT ubiquitin ligases. *Sci Rep* 8: 6419.
- 1132 Matsuura, R., T. Ashikawa, Y. Nozaki, and D. Kitagawa, 2016 LIN-41 inactivation leads to  
1133 delayed centrosome elimination and abnormal chromosome behavior during female  
1134 meiosis in *Caenorhabditis elegans*. *Mol Biol Cell* 27: 799–811.
- 1135 McCarter, J., B. Bartlett, T. Dang, and T. Schedl, 1999 On the control of oocyte meiotic  
1136 maturation and ovulation in *Caenorhabditis elegans*. *Dev Biol* 205: 111–128.
- 1137 McNally, K., A. Audhya, K. Oegema, and F. J. McNally, 2006 Katanin controls mitotic and  
1138 meiotic spindle length. *J Cell Biol* 175: 881–891.
- 1139 Miller, M. A., V. Q. Nguyen, M.-H. Lee, M. Kosinski, T. Schedl *et al.*, 2001 A sperm  
1140 cytoskeletal protein that signals oocyte meiotic maturation and ovulation. *Science* 291:  
1141 2144–2147.
- 1142 Mitschka, S., T. Ulas, T. Goller, K. Schneider, A. Egert *et al.*, 2015 Co-existence of intact  
1143 stemness and priming of neural differentiation programs in mES cells lacking Trim71.  
1144 *Sci Rep* 5: 11126.
- 1145 Nance, J., and C. Frøkjær-Jensen, 2019 The *Caenorhabditis elegans* transgenic toolbox. *Genetics*  
1146 212: 959–990.
- 1147 Newport, J., and M. Kirschner, 1982a A major developmental transition in early *Xenopus*  
1148 embryos: I. Characterization and timing of cellular changes at the midblastula stage. *Cell*  
1149 30: 675–686.
- 1150 Newport, J., and M. Kirschner, 1982b A major developmental transition in early *Xenopus*  
1151 embryos: II. Control of the onset of transcription. *Cell* 30: 687–696.
- 1152 Nishi, Y., and R. Lin, 2005 DYRK2 and GSK-3 phosphorylate and promote the timely  
1153 degradation of OMA-1, a key regulator of the oocyte-to-embryo transition in *C. elegans*.

- 1154 Dev Biol 288: 139–149.
- 1155 O'Farrell, F., S. S. Esfahani, Y. Engström, and P. Kylsten, 2008 Regulation of the *Drosophila*  
1156 *lin-41* homologue *dappled* by *let-7* reveals conservation of a regulatory mechanism  
1157 within the LIN-41 subclade. Dev Dyn 237: 196–208.
- 1158 Pritchard, D. K., and G. Schubiger, 1996 Activation of transcription in *Drosophila* embryos is a  
1159 gradual process mediated by the nucleocytoplasmic ratio. Genes Dev 10: 1131–1142.
- 1160 Redemann, S., S. Schloissnig, S. Ernst, A. Pozniakowsky, S. Ayloo *et al.*, 2011 Codon  
1161 adaptation-based control of protein expression in *C. elegans*. Nat Methods 8: 250–252.
- 1162 Reichard, E. L., G. G. Chirico, W. J. Dewey, N. D. Nassif, K. E. Bard *et al.*, 2016 Substrate  
1163 ubiquitination controls the unfolding ability of the proteasome. J Biol Chem 291: 18547–  
1164 18561.
- 1165 Reinhart, B. J., F. J. Slack, M. Basson, A. E. Pasquinelli, J. C. Bettinger *et al.*, 2000 The 21-  
1166 nucleotide *let-7* RNA regulates developmental timing in *Caenorhabditis elegans*. Nature  
1167 403: 901–906.
- 1168 Robertson, S., and R. Lin, 2013 The oocyte-to-embryo transition. Adv Exp Med Biol 757: 351–  
1169 372.
- 1170 Robertson, S., and R. Lin, 2015 The maternal-to-zygotic transition in *C. elegans*. Curr Top Dev  
1171 Biol 113: 1–42.
- 1172 Rose, K. L., V. P. Winfrey, L. H. Hoffman, D. H. Hall, T. Furuta *et al.*, 1997 The POU gene *ceh-*  
1173 *18* promotes gonadal sheath cell differentiation and function required for meiotic  
1174 maturation and ovulation in *Caenorhabditis elegans*. Dev Biol 192: 59–77.
- 1175 Rosu, S., and O. Cohen-Fix, 2017 Live-imaging analysis of germ cell proliferation in the *C.*  
1176 *elegans* adult supports a stochastic model for stem cell proliferation. Dev Biol 423: 93–

- 1177 100.
- 1178 Rosu, S., and O. Cohen-Fix, 2020 Tracking germline stem cell dynamics *in vivo* in *C. elegans*  
1179 using photoconversion. *Methods Mol Biol* 2150: 11–23.
- 1180 Rybak, A., H. Fuchs, K. Hadian, L. Smirnova, E. A. Wulczyn *et al.*, 2009 The *let-7* target gene  
1181 mouse *lin-41* is a stem cell specific E3 ubiquitin ligase for the miRNA pathway protein  
1182 Ago2. *Nat Cell Biol* 11: 1411–1420.
- 1183 Sarov, M., J. I. Murray, K. Schanze, A. Pozniakovski, W. Niu *et al.*, 2012 A genome-scale  
1184 resource for *in vivo* tag-based protein function exploration in *C. elegans*. *Cell* 150: 855–  
1185 866.
- 1186 Schneider, C. A., W. S. Rasband, and K. W. Eliceiri, 2012 NIH Image to ImageJ: 25 years of  
1187 image analysis. *Nat Methods* 9: 671–675.
- 1188 Seydoux, G., and A. Fire, 1994 Soma-germline asymmetry in the distributions of embryonic  
1189 RNAs in *Caenorhabditis elegans*. *Development* 120: 2823–2834.
- 1190 Sha, Q. Q., X. X. Dai, Y. Dang, F. Tang, J. Liu *et al.*, 2017 A MAPK cascade couples maternal  
1191 mRNA translation and degradation to meiotic cell cycle progression in mouse oocytes.  
1192 *Development* 144: 452–463.
- 1193 Shakes, D. C., P. L. Sadler, J. M. Schumacher, M. Abdolrasulnia, and A. Golden, 2003  
1194 Developmental defects observed in hypomorphic anaphase-promoting complex mutants  
1195 are linked to cell cycle abnormalities. *Development* 130: 1605–1620.
- 1196 Shirayama, M., M. C. Soto, T. Ishidate, S. Kim, K. Nakamura *et al.*, 2006 The conserved kinases  
1197 CDK-1, GSK-3, KIN-19, and MBK-2 promote OMA-1 destruction to regulate the  
1198 oocyte-to-embryo transition in *C. elegans*. *Curr Biol* 16: 47–55.
- 1199 Singh, S., and J. Sivaraman, 2020 Crystal structure of HECT domain of UBE3C E3 ligase and its



- 1200 ubiquitination activity. *Biochem J* 477: 905–923.
- 1201 Slack, F. J., M. Basson, Z. Liu, V. Ambros, H. R. Horvitz *et al.*, 2000 The *lin-41* RBCC gene  
1202 acts in the *C. elegans* heterochronic pathway between the *let-7* regulatory RNA and the  
1203 LIN-29 transcription factor. *Mol Cell* 5: 659–669.
- 1204 Spieth, J., G. Brooke, S. Kuersten, K. Lea, and T. Blumenthal, 1993 Operons in *C. elegans*:  
1205 polycistronic mRNA precursors are processed by trans-splicing of SL2 to downstream  
1206 coding regions. *Cell* 73: 521–532.
- 1207 Spike, C. A., D. Coetzee, C. Eichten, X. Wang, D. Hansen *et al.*, 2014a The TRIM-NHL protein  
1208 LIN-41 and the OMA RNA-binding proteins antagonistically control the prophase-to-  
1209 metaphase transition and growth of *Caenorhabditis elegans* oocytes. *Genetics* 198: 1535–  
1210 1558.
- 1211 Spike, C. A., D. Coetzee, Y. Nishi, T. Guven-Ozkan, M. Oldenbroek *et al.*, 2014b Translational  
1212 control of the oogenic program by components of OMA ribonucleoprotein particles in  
1213 *Caenorhabditis elegans*. *Genetics* 198: 1513–1533.
- 1214 Spike, C. A., G. Huelgas-Morales, T. Tsukamoto, and D. Greenstein, 2018 Multiple mechanisms  
1215 inactivate the LIN-41 RNA-binding protein to ensure a robust oocyte-to-embryo  
1216 transition in *Caenorhabditis elegans*. *Genetics* 210: 1011–1037.
- 1217 Stitzel, M. L., J. Pellettieri, and G. Seydoux, 2006 The *C. elegans* DYRK kinase MBK-2 marks  
1218 oocyte proteins for degradation in response to meiotic maturation. *Curr Biol* 16: 56–62.
- 1219 Teixeira, F. K., and R. Lehmann, 2019 Translational control during developmental transitions.  
1220 *Cold Spring Harb Perspect Biol* 11: a032987.
- 1221 The *C. elegans* Deletion Mutant Consortium, 2012 Large-scale screening for targeted knockouts  
1222 in the *Caenorhabditis elegans* genome. *G3 (Bethesda)* 2: 1415–1425.

- 1223 Timmons, L., and A. Fire, 1998 Specific interference by ingested dsRNA. *Nature* 395: 854.
- 1224 Tocchini, C., J. J. Keusch, S. B. Miller, S. Finger, H. Gut *et al.*, 2014 The TRIM-NHL protein  
1225 LIN-41 controls the onset of developmental plasticity in *Caenorhabditis elegans*. *PLoS*  
1226 *Genet* 10: e1004533.
- 1227 Torres-Fernández, L. A., J. Emich, Y. Port, S. Mitschka, M. Wöste *et al.*, 2021a TRIM71  
1228 deficiency causes germ cell loss during mouse embryogenesis and is associated with  
1229 human male infertility. *Front Cell Dev Biol* 9: 658966.
- 1230 Torres-Fernández, L. A., S. Mitschka, T. Ulas, S. Weise, K. Dahm *et al.*, 2021b The stem cell-  
1231 specific protein TRIM71 inhibits maturation and activity of the pro-differentiation  
1232 miRNA *let-7* via two independent molecular mechanisms. *RNA* 27: 805–828.
- 1233 Tsien, R. Y., 1998 The green fluorescent protein. *Annu Rev Biochem* 67: 509–544.
- 1234 Tsukamoto, T., M. D. Gearhart, C. A. Spike, G. Huelgas-Morales, M. Mews *et al.*, 2017 LIN-41  
1235 and OMA ribonucleoprotein complexes mediate a translational repression-to-activation  
1236 switch controlling oocyte meiotic maturation and the oocyte-to-embryo transition in  
1237 *Caenorhabditis elegans*. *Genetics* 206: 2007–2039.
- 1238 van der Voet, M., M. A. Lorson, D. G. Srinivasan, K. L. Bennett, and S. van den Heuvel, 2009  
1239 *C. elegans* mitotic cyclins have distinct as well as overlapping functions in chromosome  
1240 segregation. *Cell Cycle* 8: 4091–4102.
- 1241 Wang, R., Z. Kaul, C. Ambardekar, T. G. Yamamoto, K. Kavdia *et al.*, 2013 HECT-E3 ligase  
1242 ETC-1 regulates securin and cyclin B1 cytoplasmic abundance to promote timely  
1243 anaphase during meiosis in *C. elegans*. *Development* 140: 2149–2159.
- 1244 Ward, S., Y. Argon, and G. A. Nelson, 1981 Sperm morphogenesis in wild-type and fertilization-  
1245 defective mutants of *Caenorhabditis elegans*. *J Cell Biol* 91: 26–44.

- 1246 Welcker, M., and B. E. Clurman, 2008 FBW7 ubiquitin ligase: a tumour suppressor at the  
1247 crossroads of cell division, growth and differentiation. *Nat Rev Cancer* 8: 83–93.
- 1248 Welcker, M., A. Orian, J. E. Grim, J. A. Grim, R. N. Eisenman *et al.*, 2004 A nucleolar isoform  
1249 of the Fbw7 ubiquitin ligase regulates c-Myc and cell size. *Curr Biol* 14: 1852–1857.
- 1250 Worringer, K. A., T. A. Rand, Y. Hayashi, S. Sami, K. Takahashi *et al.*, 2014 The *let-7*/LIN-41  
1251 pathway regulates reprogramming to human induced pluripotent stem cells by controlling  
1252 expression of prodifferentiation genes. *Cell Stem Cell* 14: 40–52.
- 1253 Yoon, S., I. Kawasaki, and Y. H. Shim, 2017 The B-type cyclin CYB-1 maintains the proper  
1254 position and number of centrosomes during spermatogenesis in. *J Cell Sci* 130: 2722–  
1255 2735.
- 1256 You, J., and C. M. Pickart, 2001 A HECT domain E3 enzyme assembles novel polyubiquitin  
1257 chains. *J Biol Chem* 276: 19871–19878.
- 1258 You, J., M. Wang, T. Aoki, T. A. Tamura, and C. M. Pickart, 2003 Proteolytic targeting of  
1259 transcriptional regulator TIP120B by a HECT domain E3 ligase. *J Biol Chem* 278:  
1260 23369–23375.
- 1261 Zavortink, M., L. N. Rutt, S. Dzitoyeva, J. C. Henriksen, C. Barrington *et al.*, 2020 The E2  
1262 Marie Kondo and the CTLH E3 ligase clear deposited RNA binding proteins during the  
1263 maternal-to-zygotic transition. *Elife* 9: e53889.
- 1264 Zevian, S. C., and J. L. Yanowitz, 2014 Methodological considerations for heat shock of the  
1265 nematode *Caenorhabditis elegans*. *Methods* 68: 450–457.
- 1266

1267

## FIGURE LEGENDS

1268 Figure 1. SEL-10 is expressed in oocytes and embryos and promotes the degradation of  
1269 mSCARLET::LIN-41 during the OET. mSCARLET::LIN-41 (A, B, D, and F), GFP::SEL-10 (C)  
1270 and SEL-10::GFP (E) fluorescence in *C. elegans* germlines (solid outlines) and early embryos  
1271 (dashed outlines). mSCARLET::LIN-41 is rapidly degraded after oogenesis in the wild type (A)  
1272 and *sel-10(tn1875[gfp::3xflag::sel-10])* (D) hermaphrodites but persists in early embryos in the  
1273 *sel-10(ok1632)* deletion (B) and *sel-10(tn1817[sel-10::gfp::3xflag])* (F) hermaphrodites.  
1274 Embryos with an increased amount of mSCARLET::LIN-41 relative to *sel-10(+)* embryos are  
1275 outlined in magenta (B and F). Landmark structures such as the distal mitotic region of the  
1276 germline (arrow in A), the proximal-most oocytes (arrowheads in A) and the spermatheca (sp),  
1277 are indicated for reference. Scale bars, 100  $\mu\text{m}$ .

1278

1279 Figure 2. SEL-10 degrades oocyte-expressed DENDRA::LIN-41. Red and green channel  
1280 fluorescence (A–C and F–H) in DENDRA::LIN-41-expressing *sel-10(ok1632)* (A–E) and *sel-*  
1281 *10(+)* (F–J) hermaphrodites. The positions of oocytes (solid outlines), embryos (dashed outlines)  
1282 and spermathecae (sp) are indicated for reference. Images were collected either before  
1283 photoactivation (A and F), immediately after photoactivation of the –1 oocyte (arrowheads, B  
1284 and G) or after a 100-min recovery period (C–E and H–J). Embryos with above-background  
1285 levels of red channel fluorescence are outlined in magenta; the embryo that most likely  
1286 developed from the photoactivated –1 oocyte is indicated with an arrowhead (C and H).  
1287 Magnified red channel fluorescence (D and I) and DIC images (E and J) of this embryo are  
1288 shown. Scale bars, 50  $\mu\text{m}$  (A–C and F–H) and 20  $\mu\text{m}$  (D, E, I, and J).

1289

1290 Figure 3. PUF-11::GFP and PUF-3::GFP are degraded during the OET. (A–F) PUF-11::GFP (A),  
1291 PUF-3::GFP (D and G) and mSCARLET::LIN-41 (B and E) fluorescence in *C. elegans*  
1292 germlines (solid outlines) and early embryos (dashed outlines). The arrow in (A and D) indicates  
1293 the distal mitotic region of each germline. Merged images of (A and B) and (D and E) are shown  
1294 in (C) and (F), respectively. (G–J) Images of *itIs37[pie-1p::mcherry::histoneH2B::pie-1 3'UTR,*  
1295 *unc-119(+)] puf-3(tn1820[puf-3::gfp::3xflag])* oocytes and embryos reveal that PUF-3::GFP (G)  
1296 is strongly reduced in a meiosis I stage embryo (MI) relative to the –1 oocyte. Chromosomes are  
1297 marked with mCHERRY:HISTONE (H), and the oocyte-derived chromosomes in this MI  
1298 embryo appear to be aligning on the metaphase plate. PUF-3::GFP is at background levels in the  
1299 adjacent post-meiotic 1-cell embryo (pn); this embryo has two polar bodies and maternal and  
1300 paternal pronuclei at opposite ends of the embryo. Merged and DIC images of the same oocytes  
1301 and embryos are shown in (I) and (J), respectively. The fluorescent images in this series (G–I)  
1302 are 3D projections of a Z-stack. The DIC image (J) shows a single focal plane. Embryos with  
1303 slightly higher levels of GFP and mSCARLET relative to older embryos are outlined in green  
1304 and magenta, respectively (D, E, and G–J). Scale bars, 100  $\mu$ m (A–F) and 50  $\mu$ m (G–J). (K)  
1305 PUF-3::GFP levels decrease after meiotic resumption. Mean GFP fluorescence was measured in  
1306 images of *itIs37[pie-1p::mcherry::histoneH2B::pie-1 3'UTR] puf-3(tn1820)* oocytes and  
1307 embryos and background-corrected. Fluorescence intensity is expressed relative to the amount of  
1308 GFP fluorescence in the oldest oocyte with an intact nucleus; this is the –2 oocyte if the –1  
1309 oocyte has initiated nuclear envelope breakdown (NEBD) or is starting to move into the  
1310 spermatheca (early ovulation stage). Embryonic meiotic stage (e.g., metaphase I, telophase I and

1311 metaphase II) was classified based on the arrangement and organization of maternal  
1312 chromosomes.

1313

1314 Figure 4. The elimination of PUF-3::GFP and PUF-11::GFP requires active CDK-1 but does not  
1315 require SEL-10. PUF-3::GFP (A–D) and PUF-11::GFP (E–H) fluorescence in *C. elegans*  
1316 germlines (solid outlines) and early embryos (dashed outlines) in *cdk-1(RNAi)* (A and E), *wee-*  
1317 *1.3(RNAi)* (B and F), *lon-3(e2175)* (C and G) and *lon-3(e2175) sel-10(ar41)* (D and H)  
1318 hermaphrodites. For each GFP fusion protein, the images of the *lon-3(e2175)* and *lon-3(e2175)*  
1319 *sel-10(ar41)* animals were collected using the same settings (e.g., C and D). Embryos that appear  
1320 GFP-positive are outlined in green. Arrowheads indicate the most proximal oocyte in each *wee-*  
1321 *1.3(RNAi)* gonad that is strongly GFP-positive. The position of the spermatheca (sp) is indicated  
1322 for reference. (I) This graph illustrates the relative position of the most proximal mSCARLET or  
1323 GFP-positive oocyte in 12 different *lin-41(tn1892[mScarlet::3xflag:lin-41]); puf-11(tn1824[puf-*  
1324 *11:gfp::3xflag]); wee-1.3(RNAi)* animals. *wee-1.3(RNAi)* animals with well-formed and  
1325 organized oocytes were scored. Oocyte position was measured relative to other oocytes and the  
1326 spermatheca (position 0). Each animal is represented by a different symbol (e.g., filled diamond  
1327 or open circle). The color of the symbol represents the fusion protein that was scored:  
1328 mSCARLET::LIN-41 in magenta and PUF-3::GFP in green. The vertical bar indicates the  
1329 median. Scale bars, 50  $\mu$ m (A–H).

1330

1331 Figure 5. *etc-1(gk5182)* perturbs the degradation of GFP-fusion proteins during the OET. PUF-  
1332 3::GFP (A and B), PUF-11::GFP (C and D), CYB-1::GFP (E and F), mSCARLET::LIN-41 (G

1333 and H), IFY-1::GFP (I and J) and GFP<sub>F</sub>::LIN-41 (K and L) fluorescence in young *etc-1(+)* (A, C,  
1334 E, G, I, and K) and *etc-1(gk5182)* (B, D, F, H, J, and L) embryos. In each image, the position of  
1335 the spermatheca (sp) is indicated for reference. Young embryos in the uterus are indicated with  
1336 dashed outlines that highlight individual embryos (A–H, K, and L) or a bracket that indicates a  
1337 region containing multiple post-meiotic embryos (I and J). GFP-positive embryos are indicated  
1338 in green (A–F and I–L) while mSCARLET-positive embryos are indicated in magenta (G and  
1339 H). For each fusion protein, these embryos contain detectably more fluorescence than the *etc-*  
1340 *I(+)* embryos indicated in white. CYB-1::GFP re-accumulates to relatively high levels in older  
1341 *etc-1(+)* embryos (E, arrowhead; this embryo is no longer in the uterus) and therefore has a  
1342 distinctly different expression pattern than the other OET-degraded fusion proteins. Scale bars,  
1343 50  $\mu\text{m}$ .

1344

1345 Figure 6. ETC-1 is expressed in the *C. elegans* germline. (A) *etc-1* alleles and the exon-intron  
1346 structure of *etc-1*, the downstream gene in operon CEOP2380. Exons are shown as open boxes;  
1347 the region of exon 1 colored in pink would encode 20 additional amino acids if translation is  
1348 initiated at ATG #1, the start codon immediately adjacent to the annotated SL1/SL2 trans-splice  
1349 site (orange), instead of ATG #2. Other colors indicate the 3' UTR of the upstream gene eIF-2B  
1350 (gray) and the regions that encode the conserved IQ (purple) and HECT (yellow) domains of  
1351 ETC-1. (B) The N-terminus of ETC-1 aligned with the N-terminus of the human ortholog  
1352 UBE3C; the amino acids predicted to be added to ETC-1 are in pink. This is the N-terminal  
1353 portion of a full-length protein alignment generated by EMBOSS Needle with default alignment  
1354 parameters. ETC-1 and UBE3C were 26% identical or 46% similar overall with 16% of the  
1355 alignment gapped. (C and D) GFP::ETC-1 fluorescence in *C. elegans* germlines (solid outlines)

1356 and early embryos (dashed outlines). GFP is N-terminal to either the first (C, *etc-*  
1357 *l(tn1919[gfp::3xflag::etc-1 #1])*) or second (D, *etc-1(tn1920[gfp::3xflag::etc-1#2])*) methionine  
1358 of ETC-1. Scale bars, 100  $\mu$ m. (E) A western blot of GFP::ETC-1 (~150 kDa, see main text) and  
1359 PUF-3::GFP-expressing strains with an anti-FLAG antibody that recognizes both fusion proteins.  
1360 GFP::FLAG fragments derived from PUF-3::GFP strongly accumulate in *etc-1(gk5182)* and *etc-*  
1361 *l(tn1920[gfp::3xflag::etc-1#2])* hermaphrodites.

1362

1363 Figure 7. GFP-tagged fusion proteins are partially proteolyzed in *etc-1(gk5182)* animals. (A–E)  
1364 Western blots with a FLAG-specific primary antibody. Three FLAG tags are located at the  
1365 extreme C-terminus of PUF-3::GFP, PUF-11::GFP, CYB-1::GFP and IFY-1::GFP and in-  
1366 between LIN-41 and each fluorescent protein (mSCARLET, DENDRA, or GFP). The predicted  
1367 molecular mass of each full-length fusion protein (vertical line) is ~89 kDa for each PUF::GFP  
1368 fusion protein (A and B), 73 kDa for CYB-1::GFP (A and B), 154–156 kDa for each LIN-41  
1369 fusion protein (C and E), and 61 kDa for IFY-1::GFP (D). The same set of molecular weight  
1370 markers (horizontal lines) were used in (A) and (B). A partially proteolyzed GFP::FLAG-  
1371 containing fragment >32 kDa (arrow) accumulates in the *etc-1(gk5182)* animals that express a  
1372 GFP fusion protein (A, B, D, and E). The protein lysates were made from adult hermaphrodites  
1373 (A, C, D, and E), adult females (B) or adult males (B), as indicated.

1374



1375

## LEGENDS TO SUPPLEMENTAL FIGURES

1376 Figure S1. Alleles used in this study. (A) The exon-intron structures and allele names of the *sel-*  
1377 *10* alleles used in this study. Exons are shown as open boxes. Colored regions of the *sel-10* exons  
1378 encode the conserved F box (orange) and 7 WD repeat (gray) domains found in SEL-10. The  
1379 GFP and FLAG-encoding regions added to the GFP-tagged alleles are colored in green and cyan,  
1380 respectively. (B) The exon-intron structures and allele names of the *lin-41* alleles used in this  
1381 study. Colored regions of the *lin-41* exons encode the conserved RING (yellow), B-box (orange),  
1382 BBC (blue), Ig/filamin (purple) and NHL repeats (red) domains found in LIN-41. Fusion protein  
1383 tags include GFP (green), S tag (gray), mSCARLET-I (brick red), FLAG tag (cyan) and  
1384 DENDRA (green to red color gradient). (C) The exon-intron structures and allele names of *puf-*  
1385 *3::gfp::3xflag*, *puf-11::gfp::3xflag*, *cyb-1::gfp::3xflag* and *rnp-8::gfp::3xflag*. The Pumilio-like  
1386 repeats of PUF-3 and PUF-11 are in yellow. The Cyclin-N and Cyclin-C motifs of CYB-1 are in  
1387 blue and orange, respectively. The RNA recognition motif (RRM) present in RNP-8 is in purple.  
1388 As in prior panels, the GFP and FLAG protein tags are in green and cyan, respectively.

1389

1390 Figure S2. GLD-1 is degraded normally in *sel-10(tn1875[gfp::3xflag::sel-10])* animals.  
1391 Dissected wild-type (A and C), *sel-10(tn1875[gfp::3xflag::sel-10])* (B) and *sel-10(tn1816[sel-*  
1392 *10::gfp::3xflag])* (D) gonads (solid outlines) that have been fixed and stained with an anti-GLD-  
1393 1 antibody. Each gonad is oriented so that the distal mitotic region is on the left and the proximal  
1394 oocyte-containing region is on the right. Two different wild-type gonads are shown because  
1395 slightly different staining and imaging conditions were used for each experiment; wild-type

1396 image A pairs with *sel-10(tn1875[gfp::3xflag::sel-10])* (A-B) and wild-type image C pairs with  
1397 *sel-10(tn1816[sel-10::gfp::3xflag])* (C and D). Scale bars, 50  $\mu\text{m}$ .

1398

1399 Figure S3. The elimination of PUF-3/11::GFP proteins during the OET. (A–C) GFP expression  
1400 in *puf-11(tn1824[puf-11::gfp::3xflag])* (A), *puf-3(tn1820[puf-3::gfp::3xflag])* (B) and *puf-*  
1401 *11(tn1824); puf-3(tn1820)* (C) animals. GFP-positive embryos are outlined in green. All images  
1402 were collected using the same settings. Scale bars, 100  $\mu\text{m}$ .

1403

1404 Figure S4. GFP-expressing alleles of *etc-1*. (A) The exon-intron structures and allele names of  
1405 the *gfp::3xflag::etc-1* alleles used in this study. Colors and labels are as described for Figure 6,  
1406 with the addition of exons (open boxes) that encode the GFP (green) and FLAG (cyan) tags. (C  
1407 and D) GFP fluorescence in *etc-1(tn1919[gfp::3xflag::etc-1#1])* (C) and *etc-*  
1408 *1(tn1920[gfp::3xflag::etc-1#2])* (D) hermaphrodites. These are larger versions of the images  
1409 shown in Figure 7 that include the region of somatic GFP expression in the head (arrow) that is  
1410 significantly brighter in *etc-1(tn1920)* hermaphrodites. GFP expression in the nucleus of an  
1411 intestinal cell is also evident in the focal plane of the *etc-1(tn1919)* image (arrowhead).  
1412 Additional somatic cells also express GFP::ETC-1, but most of these cells were not identified.  
1413 Scale bars, 100  $\mu\text{m}$ .

1414

1415 Figure S5. Additional western blots related to Figure 7. (A) A western blot that repeats the  
1416 experiment shown in Figure 7A and includes wild type and *etc-1(gk5182)* lanes with no

1417 GFP::FLAG fusion protein. (B) PUF::GFP, PUF-11::GFP, and CYB-1::GFP fusion proteins  
1418 (lines) and *etc-1(gk5182)*-specific GFP::FLAG fragments (arrows) are detected by an affinity  
1419 purified antibody that recognizes GFP. (C and D) Western blots with the anti-FLAG antibody on  
1420 GFP fusion protein-expressing hermaphrodites (C), mated *fog-2(oz40)* females (C), unmated *fog-*  
1421 *2(oz40)* females (D) and *fog-2(oz40)* males (D) with the indicated *etc-1* genotypes. For unknown  
1422 reasons, the RNP-8::GFP fusion protein detected in (C) appears to be slightly larger than  
1423 predicted. The predicted size of the large RNP-8a isoform (see <http://www.wormbase.org>,  
1424 release WS278) fused to the GFP::3xFLAG tag is 97 kDa. The blots shown in (D) and Figure 7B  
1425 are the same; Figure 7B shows a shorter exposure of the portion of the blot with the female  
1426 lysates and a longer exposure of the blot with the male CYB-1::GFP lysates. (E) A longer  
1427 exposure of the western blot shown in Figure 7C that also includes otherwise wild-type, *etc-*  
1428 *1(gk5182)* and *sel-10(lf)* animals that express DENDRA::LIN-41. (F) A longer exposure of the  
1429 western blot shown in Figure 7E. *etc-1(+)* animals that express GFP<sub>F</sub>::LIN-41 appear to  
1430 accumulate a lesser amount of the GFP::FLAG fragment seen in *etc-1(gk5182)* animals. *etc-*  
1431 *1(gk5182)*-specific fragments containing GFP::FLAG are indicated by arrows.

1432

1433 Figure S6. CYB-1::GFP expression in males. (A–F) CYB-1::GFP expression in *etc-1(+)* males  
1434 (A) and *etc-1(gk5182)* males (C and F). CYB-1::GFP disappears abruptly in *cyb-1(tn1806[cyb-*  
1435 *1::gfp::3xflag]); fog-2(oz40)* males (A and B) near the end of spermatogenesis (red boxes). At  
1436 the same stage of spermatogenesis, *etc-1(gk5182); cyb-1(tn1806[cyb-1::gfp::3xflag]); fog-*  
1437 *2(oz40)* males (C–F) have higher levels of GFP fluorescence (C) and GFP-positive residual  
1438 bodies (e.g., arrows in E and F). Scale bars, 50  $\mu$ m (A–D) and 10  $\mu$ m (E and F).

1439

1440 Figure S7. Additional images of GFP-tagged fusion proteins. (A and B) GFP is expressed at  
1441 similar levels in the germlines (solid outlines) and early embryos (dashed outlines) of *rnp-*  
1442 *8(tn1860[rpn-8::gfp::3xflag])* (A) and *etc-1(gk5182); rnp-8(tn1860[rpn-8::gfp::3xflag])* (B)  
1443 hermaphrodites. (C and D) GFP fluorescence from *lin-41(tn1541[gfp::s::lin-41])* is distinctly  
1444 brighter in the early embryos (dashed outlines) of *etc-1(gk5182)* hermaphrodites (D) relative to  
1445 *etc-1(+)* hermaphrodites (C). (E–H) The GFP<sub>S</sub>-tagged allele *lin-41(tn1541[gfp::s::lin-41])* (E)  
1446 and GFP<sub>F</sub>-tagged allele *lin-41(tn2054[gfp::3xflag::lin-41])* (G) have different levels of GFP  
1447 expression. The average GFP fluorescence intensity in the cytoplasm of the –1 and –2 oocytes of  
1448 *lin-41(tn2054)* and *lin-41(tn1541)* Day 1 adult hermaphrodites was measured (n=7 images for  
1449 each allele, collected as shown). At each oocyte position (–1 or –2), the average background-  
1450 corrected level of fluorescence was 2.4-fold higher in *lin-41(tn2054)* oocytes relative to *lin-*  
1451 *41(tn1541)* oocytes ( $P < 1 \times 10^{-6}$ ). Many *lin-41(tn2054[gfp::3xflag::lin-41])* Day 1 adult  
1452 hermaphrodites also accumulate older embryos in their uterus (H) and appear to be sluggish.  
1453 These phenotypes are shared by the independently-generated *lin-41(tn2055[gfp::3xflag::lin-41])*  
1454 allele. At 20 °C, 43% and 62% of DG5263 *lin-41(tn2055)* Day 1 and Day 2 adults (n=29),  
1455 respectively, had an egg laying (Egl) defect associated with premature mortality (dead on Day 2,  
1456 3, or 4 of adulthood) and a reduced number of progeny ( $52 \pm 21$  larvae, n=18 Egl adults;  $256 \pm$   
1457  $61$  larvae, n=11 non-Egl adults). These somatic defects are not typically seen in *lin-*  
1458 *41(tn1541[gfp::s::lin-41])* animals at the same stage of adulthood (F), and the average brood size  
1459 of *lin-41(tn1541)* animals is greater than 300 (Spike *et al.* 2014a, 2018). (I–N) GFP fluorescence  
1460 (I, K, and M) and DIC (J, L, and N) images of 2-cell *lin-41(tn2055[gfp::3xflag::lin-41])*  
1461 embryos produced by otherwise wild-type (I and J), *etc-1(gk5182)* (K and L) and *sel-10(ok1632)*

1462 (M and N) parents. GFP is diffusely cytoplasmic in each embryo and is distinctly brighter in the  
1463 *etc-1(gk5182)* and *sel-10(ok1632)* embryos relative to the wild-type embryo. Nuclear GFP  
1464 (arrowheads) is evident in wild-type (I) and *etc-1(gk5182)* (K) embryos. In contrast, some GFP  
1465 in the posterior blastomere of the *sel-10(ok1632)* embryo (M) appears to associate with P  
1466 granules (arrow). Scale bars, 50  $\mu\text{m}$  (A–H) and 10  $\mu\text{m}$  (I–N).

1467

## Figure 1

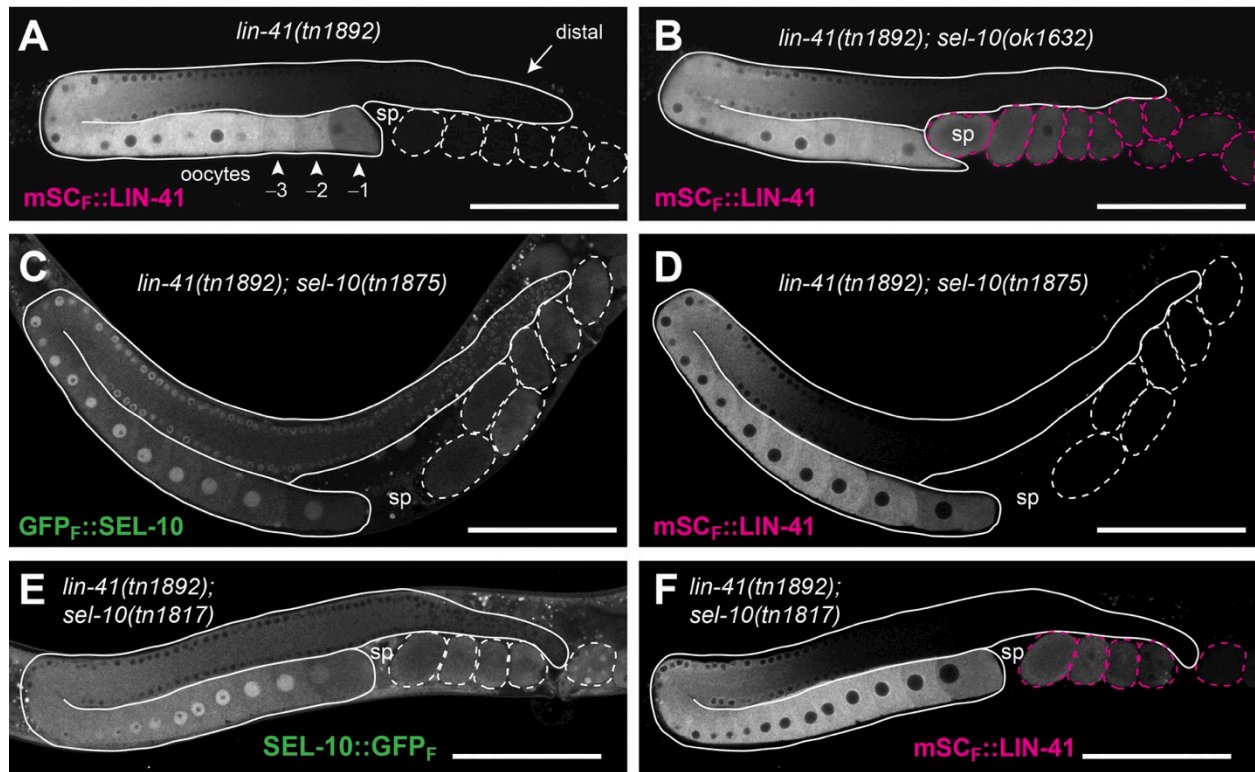

1468

1469

## Figure 2

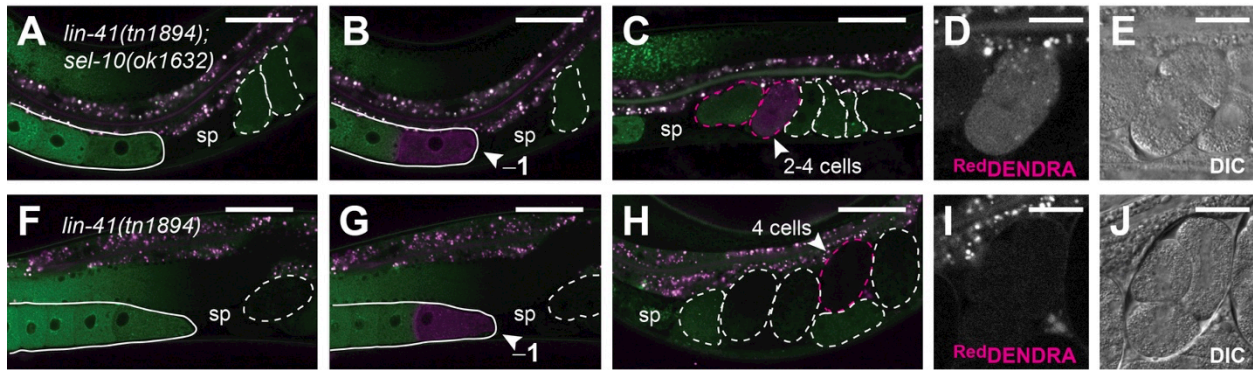

1470

1471

# Figure 3

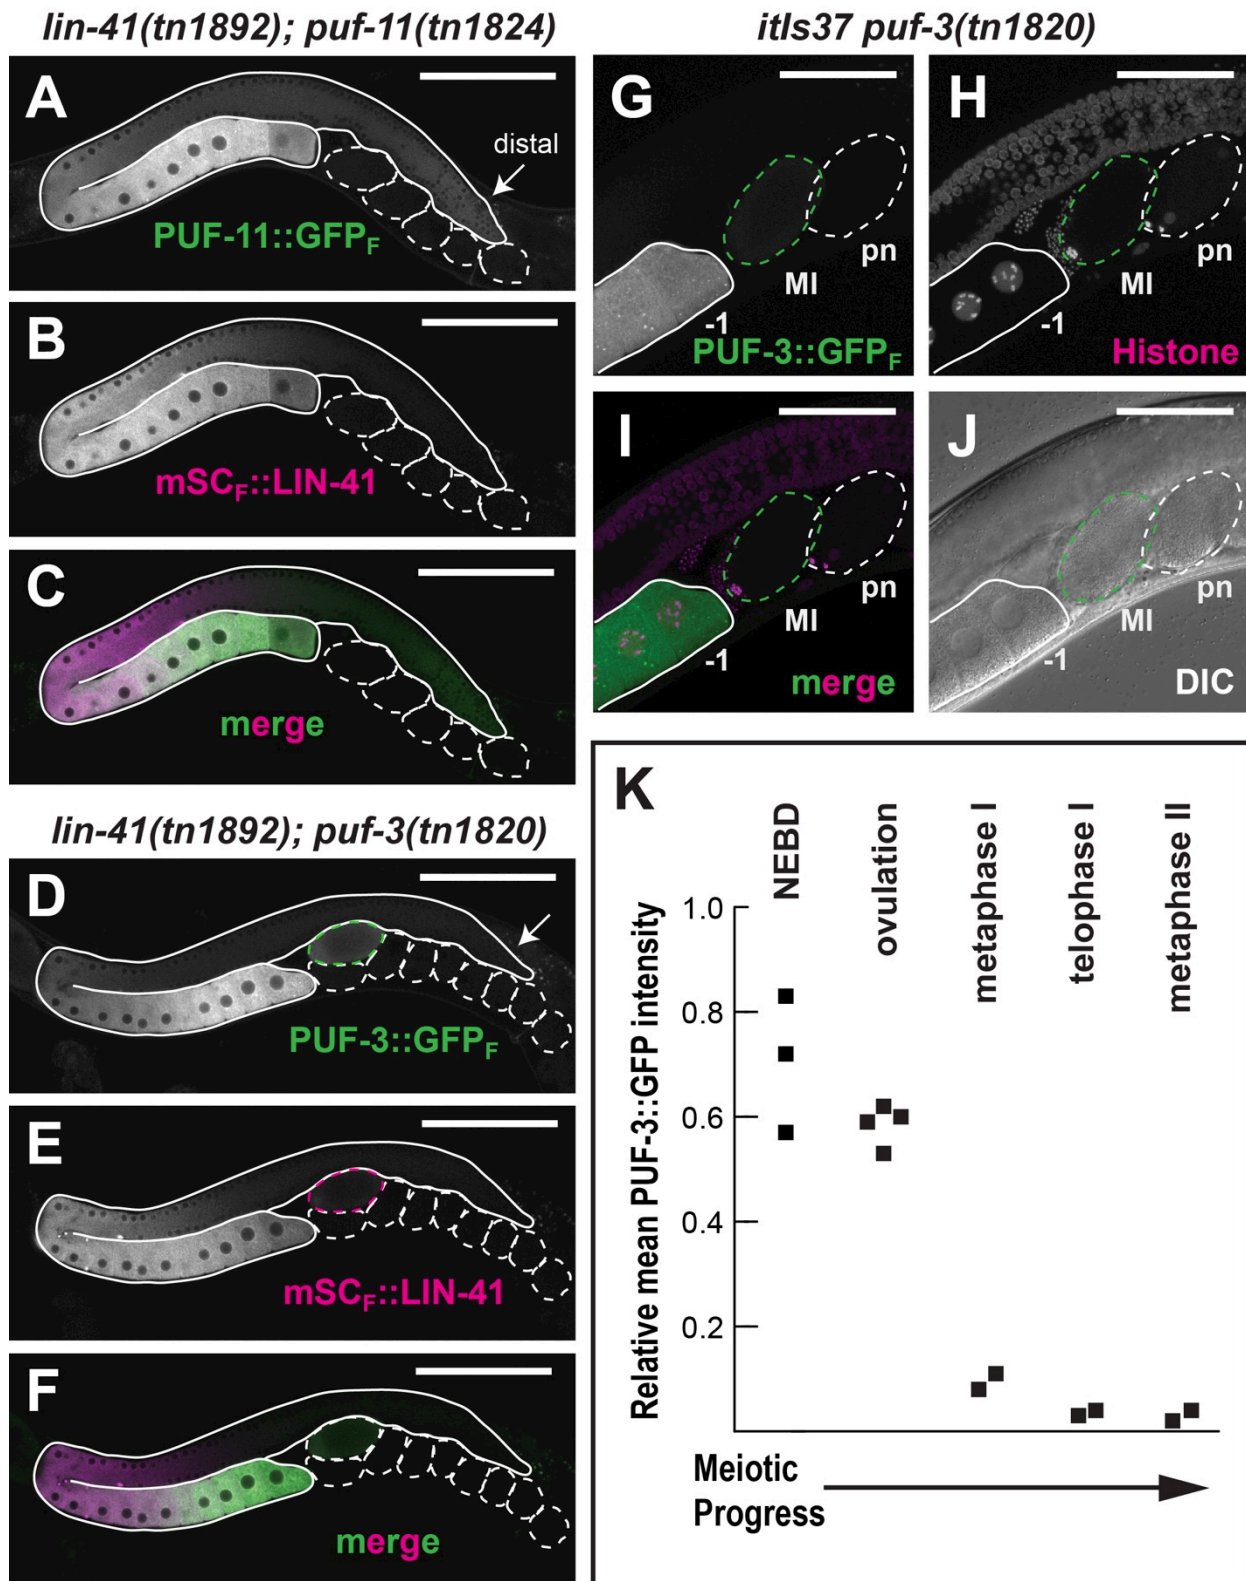



# Figure 4

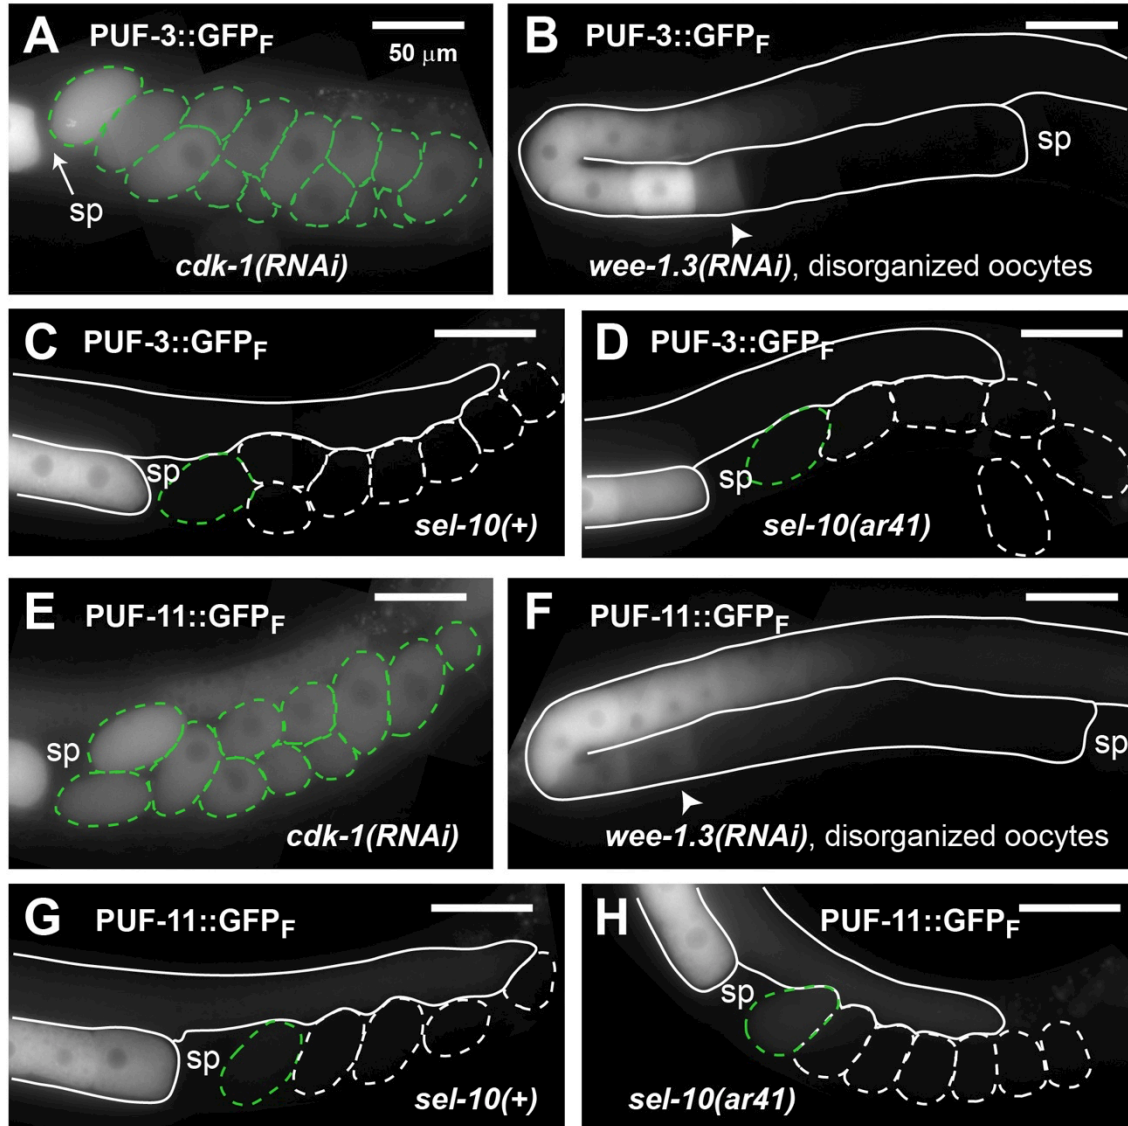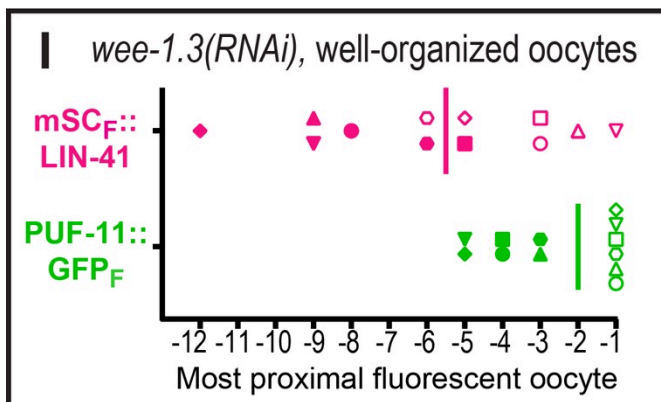

1473

# Figure 5

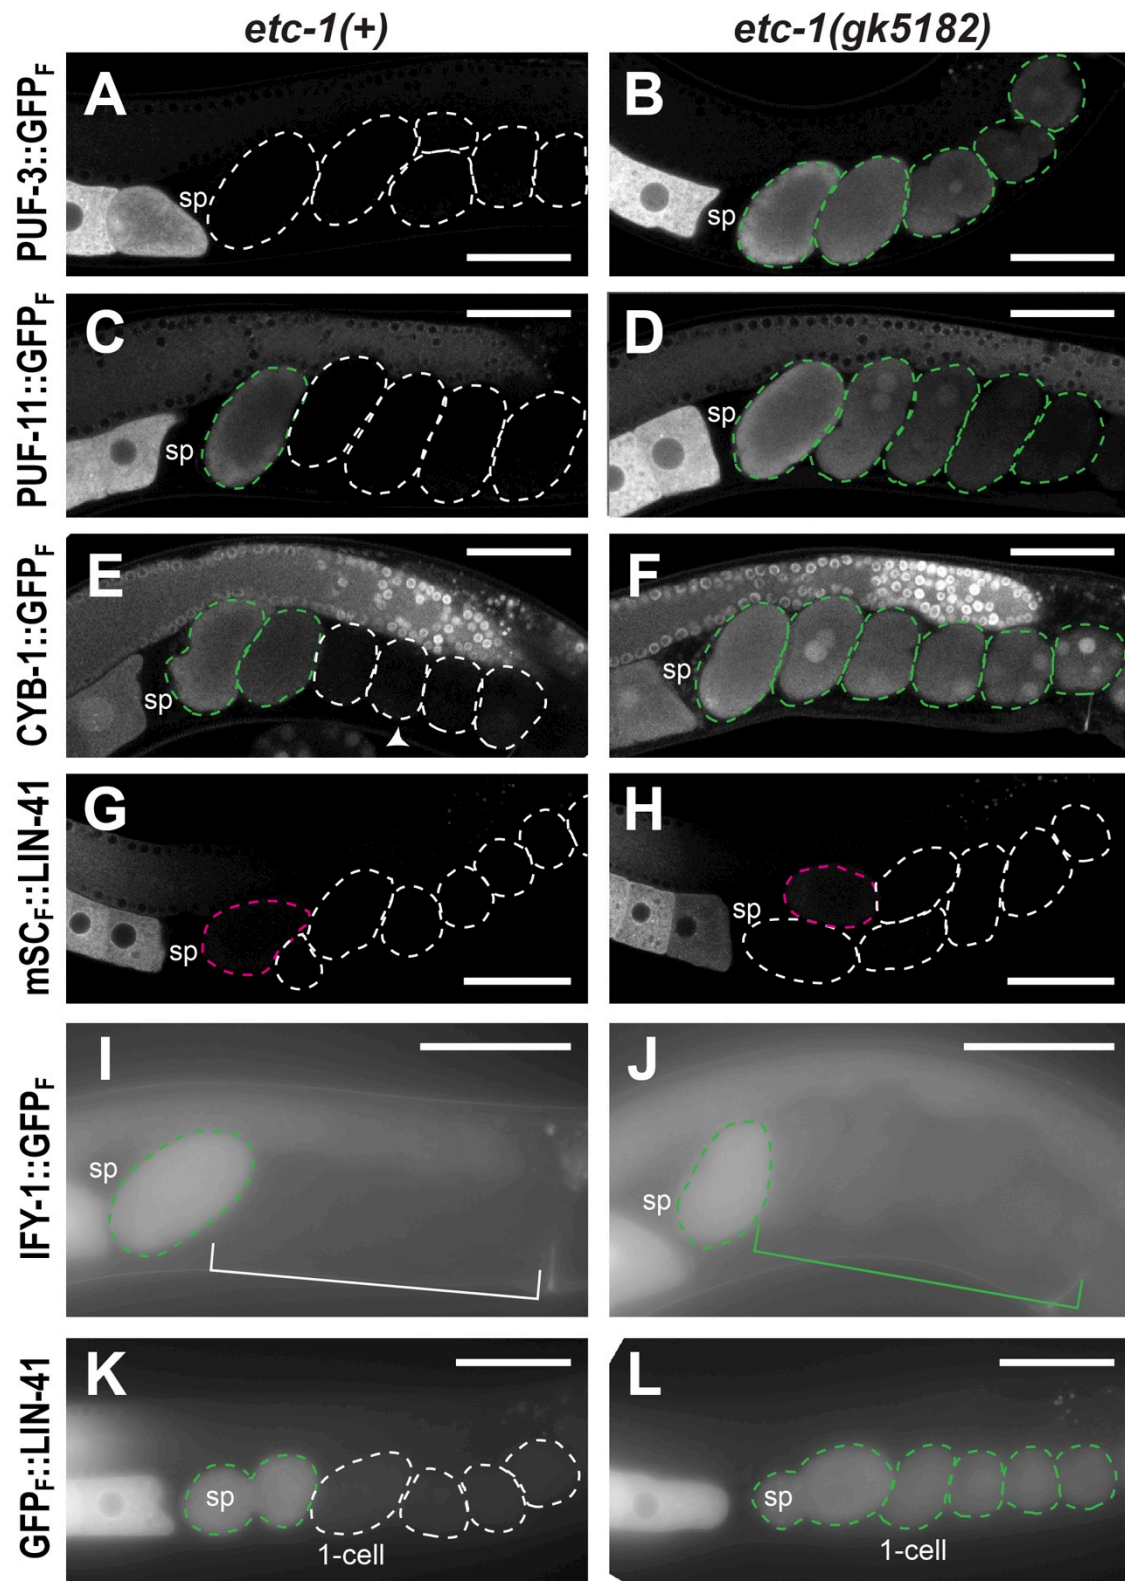

# Figure 6

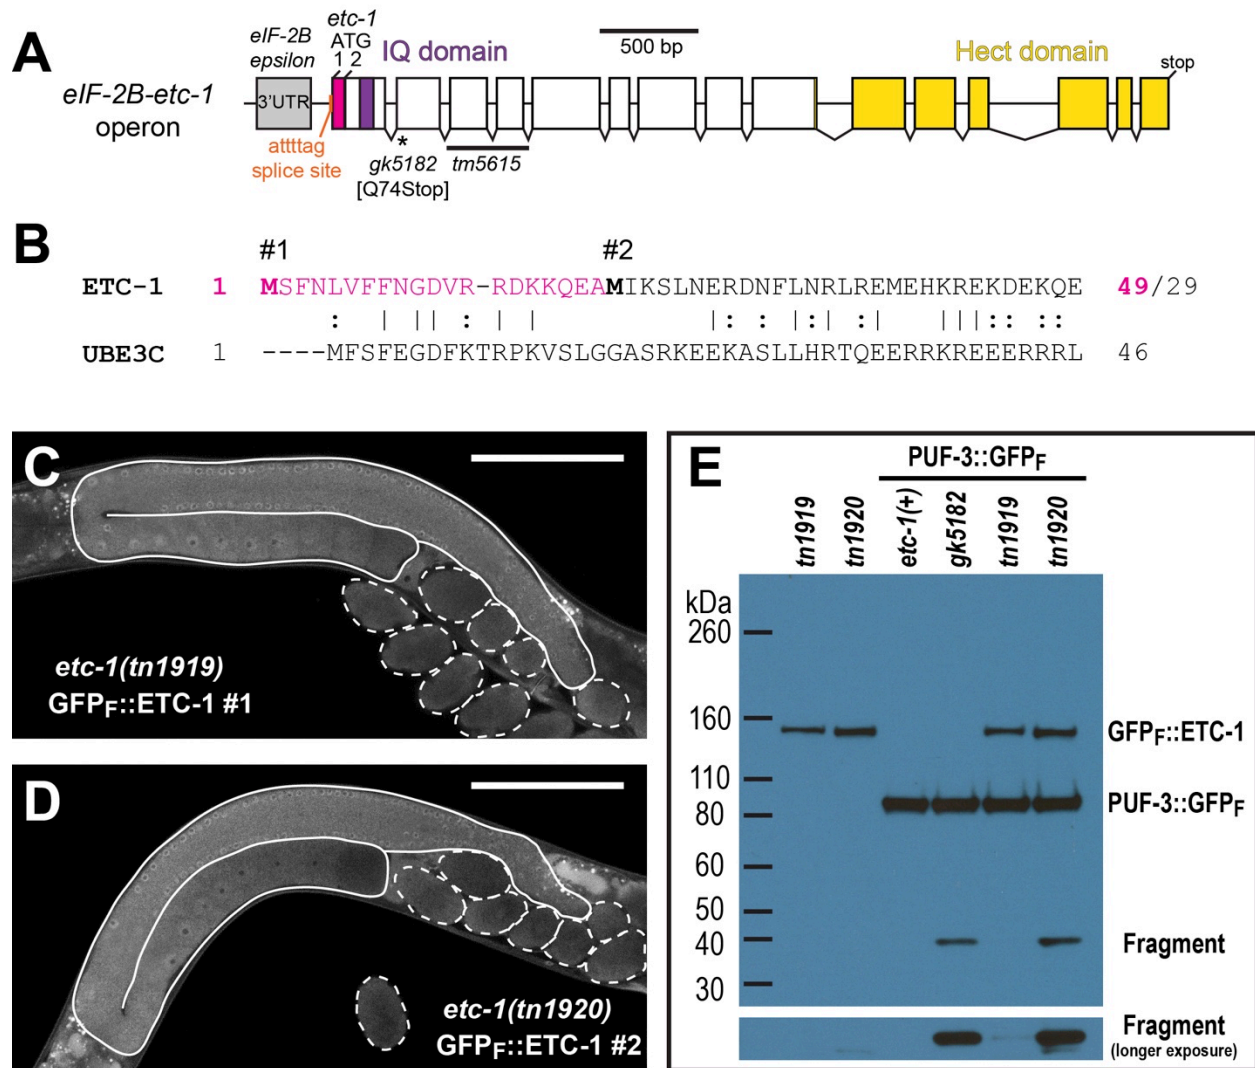

1475

1476

# Figure 7

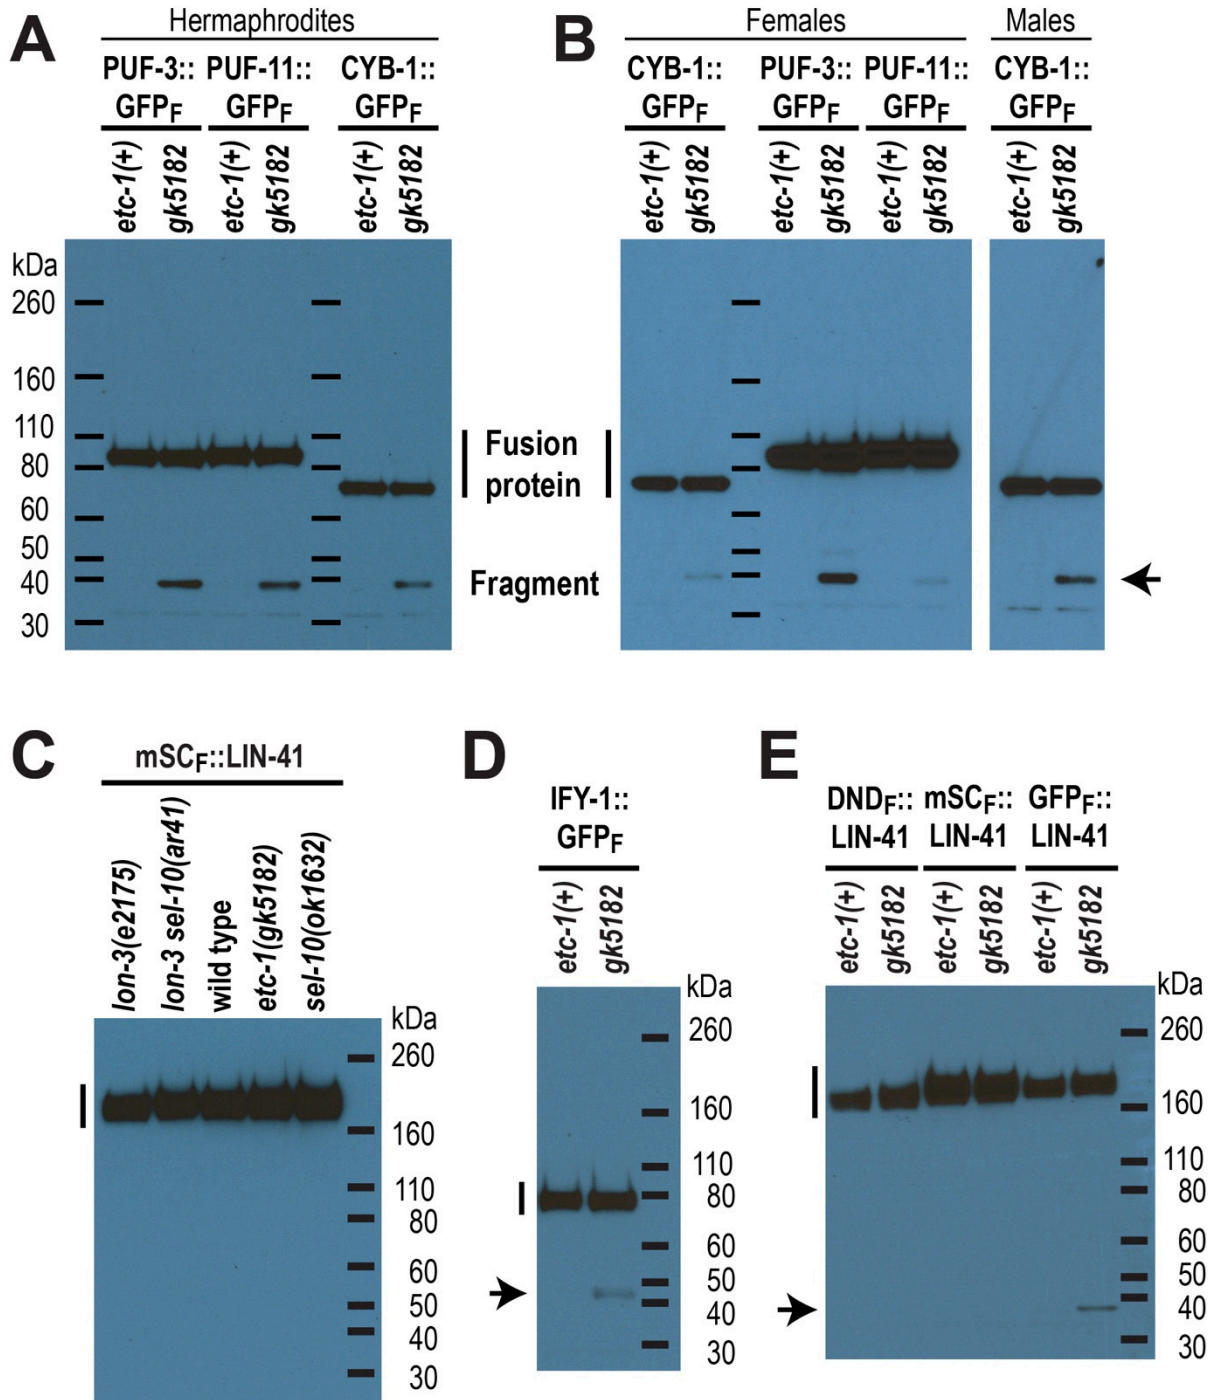

Source: https://www.biorxiv.org/content/biorxiv/early/2021/11/05/2021.11.05.467479.full.pdf
